# Supplementary material for: The energetic landscape of CH–π interactions in protein–carbohydrate binding
Source: Royal Society of Chemistry journal article supplement (doi:10.1039/d4sc06246a), 2024-12-03
Supplement: d4sc06246a1.zip [file d4sc06246a1.zip]

## Sheet: CHpi
PDB ID	EDIA	GAL_EDIA	AA_EDIA	Type	AA	Converted?	Galactose (a.u.)	Close Contact Pair (a.u.)	Amino Acid (a.u.)	Interaction Energy (a.u.)	Interaction Energy (kcal/mol)
1d6q_0	Good	0.93	0.89	Chpi	PHE	Yes	-687.354	-998.308	-310.946	-0.0075263	-4.72275
1d6q_0	Good	0.93	0.89	Chpi	TYR	No	-687.354	-1073.55	-386.191	-0.00808464	-5.07311
1g8z_3	Good	0.8	0.97	Chpi	TRP	No	-687.351	-1129.91	-442.548	-0.0125589	-7.88072
1gca_1	Good	1	1.03	Chpi	TRP	No	-687.35	-1129.89	-442.528	-0.0102222	-6.41444
1isz_0	Good	0.89	0.92	Chpi	PHE	Yes	-687.353	-998.307	-310.948	-0.00609038	-3.82171
1isz_0	Good	0.89	0.92	Chpi	TYR	No	-687.353	-1073.55	-386.191	-0.00658193	-4.13016
1isz_1	Good	0.92	0.9	Chpi	PHE	Yes	-687.356	-998.311	-310.948	-0.00761432	-4.77798
1isz_1	Good	0.92	0.9	Chpi	TYR	No	-687.356	-1073.56	-386.192	-0.00828832	-5.20092
1it0_0	Good	0.93	0.94	Chpi	PHE	Yes	-687.356	-998.312	-310.948	-0.00807494	-5.06702
1it0_0	Good	0.93	0.94	Chpi	TYR	No	-687.356	-1073.56	-386.192	-0.00871628	-5.46947
1it0_2	Good	0.9	0.87	Chpi	PHE	Yes	-687.354	-998.31	-310.948	-0.00804541	-5.0485
1it0_2	Good	0.9	0.87	Chpi	TYR	No	-687.354	-1073.55	-386.192	-0.00885417	-5.55599
1jyn_5	Good	0.98	1.02	Chpi	TRP	No	-687.353	-1129.91	-442.548	-0.0063225	-3.96737
1jyn_7	Good	0.95	1	Chpi	TRP	No	-687.352	-1129.91	-442.543	-0.0111511	-6.99733
1jz7_0	Good	0.93	0.98	Chpi	TRP	No	-687.341	-1129.9	-442.545	-0.0110676	-6.94494
1jz7_6	Good	0.96	0.98	Chpi	TRP	No	-687.329	-1129.88	-442.545	-0.00563611	-3.53666
1jz7_9	Good	0.97	1	Chpi	TRP	No	-687.332	-1129.88	-442.542	-0.00753752	-4.72979
1lt3_0	Good	0.8	1.01	Chpi	TRP	No	-687.351	-1129.91	-442.55	-0.0112438	-7.0555
1lt3_3	Good	0.94	0.98	Chpi	TRP	No	-687.349	-1129.91	-442.549	-0.0107294	-6.7327
1lt4_3	Good	0.99	1	Chpi	TRP	No	-687.35	-1129.91	-442.545	-0.0161645	-10.1432
1ns2_0	Good	0.99	1.01	Chpi	PHE	No	-687.348	-998.303	-310.947	-0.00833324	-5.22911
1ns2_0	Good	0.99	1.01	Chpi	TYR	Yes	-687.345	-1073.55	-386.191	-0.00974473	-6.11482
1ns2_1	Good	0.89	1	Chpi	PHE	No	-687.349	-998.304	-310.947	-0.00781055	-4.90112
1ns2_1	Good	0.89	1	Chpi	TYR	Yes	-687.35	-1073.55	-386.191	-0.00862795	-5.41404
1nsm_0	Good	0.91	1.03	Chpi	PHE	No	-687.346	-998.303	-310.946	-0.010522	-6.60256
1nsm_0	Good	0.91	1.03	Chpi	TYR	Yes	-687.348	-1073.55	-386.19	-0.00977603	-6.13446
1nsx_0	Good	0.98	1.05	Chpi	PHE	No	-687.348	-998.303	-310.946	-0.00832792	-5.22577
1nsx_0	Good	0.98	1.05	Chpi	TYR	Yes	-687.35	-1073.55	-386.19	-0.00912357	-5.72504
1nsx_1	Good	1.01	1.05	Chpi	PHE	No	-687.352	-998.306	-310.946	-0.00811546	-5.09245
1nsx_1	Good	1.01	1.05	Chpi	TYR	Yes	-687.349	-1073.55	-386.19	-0.00863512	-5.41854
1s5d_0	Good	0.88	1.07	Chpi	TRP	No	-687.359	-1129.92	-442.549	-0.0115428	-7.24312
1s5d_1	Good	0.89	1.05	Chpi	TRP	No	-687.354	-1129.91	-442.55	-0.0108491	-6.80781
1s5d_2	Good	0.82	1.02	Chpi	TRP	No	-687.356	-1129.92	-442.549	-0.0105571	-6.62458
1s5d_3	Good	0.85	1.04	Chpi	TRP	No	-687.356	-1129.92	-442.55	-0.0105316	-6.60861
1s5d_4	Good	0.93	1.06	Chpi	TRP	No	-687.353	-1129.91	-442.548	-0.0110033	-6.90455
1s5e_1	Good	0.86	1.03	Chpi	TRP	No	-687.334	-1129.89	-442.548	-0.0108903	-6.83369
1uc0_0	Good	0.87	0.83	Chpi	TRP	No	-687.356	-1129.91	-442.549	-0.00978214	-6.13829
1ugw_0	Good	1.01	1.01	Chpi	PHE	Yes	-687.356	-998.312	-310.948	-0.00940642	-5.90253
1ugw_0	Good	1.01	1.01	Chpi	TYR	No	-687.356	-1073.56	-386.192	-0.0102511	-6.43254
1ugw_3	Good	0.83	0.98	Chpi	PHE	Yes	-687.354	-998.31	-310.947	-0.00914285	-5.73714
1ugw_3	Good	0.83	0.98	Chpi	TYR	No	-687.354	-1073.56	-386.191	-0.0100688	-6.3182
1ugw_6	Good	1.01	1	Chpi	PHE	Yes	-687.357	-998.313	-310.947	-0.00914933	-5.74121
1ugw_6	Good	1.01	1	Chpi	TYR	No	-687.357	-1073.56	-386.191	-0.0100857	-6.32875
1urx_1	Good	0.93	0.93	Chpi	TRP	No	-687.351	-1129.91	-442.55	-0.00721606	-4.52808
1urx_3	Good	0.96	0.95	Chpi	TRP	No	-687.349	-1129.91	-442.55	-0.00733485	-4.60262
2b3f_1	Good	1.08	1.06	Chpi	TRP	No	-687.354	-1129.92	-442.551	-0.0111448	-6.99339
2b3f_11	Good	1.05	1.09	Chpi	TRP	No	-687.352	-1129.91	-442.551	-0.011232	-7.04811
2b3f_3	Good	1.06	1.07	Chpi	TRP	No	-687.354	-1129.91	-442.55	-0.0111593	-7.00245
2b3f_5	Good	1.05	1.05	Chpi	TRP	No	-687.352	-1129.91	-442.551	-0.0110658	-6.94382
2b3f_7	Good	1.07	1.04	Chpi	TRP	No	-687.353	-1129.91	-442.55	-0.0109613	-6.87819
2b3f_9	Good	1.07	1.06	Chpi	TRP	No	-687.354	-1129.91	-442.548	-0.0113849	-7.144
2cdo_0	Good	1	0.98	Chpi	TRP	No	-687.356	-1129.92	-442.55	-0.011117	-6.97594
2cdo_1	Good	1.04	1.01	Chpi	TRP	No	-687.348	-1129.91	-442.549	-0.0124152	-7.79053
2cdo_2	Good	0.98	0.98	Chpi	TRP	No	-687.345	-1129.91	-442.55	-0.012153	-7.62602
2cdo_4	Good	1.03	1	Chpi	TRP	No	-687.346	-1129.91	-442.55	-0.0114748	-7.20041
2chb_1	Good	0.84	1	Chpi	TRP	No	-687.344	-1129.9	-442.549	-0.010529	-6.60698
2chb_3	Good	0.88	1.02	Chpi	TRP	No	-687.35	-1129.91	-442.55	-0.0117665	-7.38345
2chb_4	Good	0.88	1	Chpi	TRP	No	-687.349	-1129.91	-442.547	-0.0117124	-7.34953
2d6m_0	Good	0.82	0.97	Chpi	TRP	No	-687.353	-1129.91	-442.552	-0.00950642	-5.96528
2d6n_0	Good	0.87	1	Chpi	TRP	No	-687.35	-1129.91	-442.552	-0.00993935	-6.23694
2d6n_1	Good	0.85	0.97	Chpi	TRP	No	-687.354	-1129.91	-442.55	-0.00972788	-6.10424
2d6o_0	Good	0.8	1.04	Chpi	TRP	No	-687.356	-1129.92	-442.552	-0.00967287	-6.06973
2ead_1	Good	0.83	0.92	Chpi	TRP	No	-687.342	-1129.9	-442.551	-0.0103505	-6.49495
2euk_0	Good	1.04	1.04	Chpi	TRP	No	-687.352	-1129.91	-442.55	-0.00985276	-6.1826
2nn8_0	Good	0.85	0.99	Chpi	TRP	No	-687.355	-1129.92	-442.551	-0.0104001	-6.52608
2osx_0	Good	0.92	0.95	Chpi	TRP	No	-687.356	-1129.92	-442.55	-0.00908819	-5.70284
2vno_0	Good	0.88	0.85	Chpi	TRP	No	-687.355	-1129.91	-442.551	-0.00836774	-5.25076
2vno_3	Good	0.92	0.96	Chpi	TRP	No	-687.343	-1129.9	-442.55	-0.00889086	-5.57901
2vu9_1	Good	0.98	0.93	Chpi	TRP	No	-687.348	-1129.91	-442.55	-0.00838464	-5.26136
2wkk_0	Good	0.82	1.04	Chpi	TRP	No	-687.353	-1129.91	-442.551	-0.00918439	-5.76321
2wkk_1	Good	0.8	1	Chpi	TRP	No	-687.343	-1129.9	-442.551	-0.00914566	-5.7389
2wmh_0	Good	0.81	0.86	Chpi	TRP	No	-687.348	-1129.91	-442.551	-0.0103398	-6.48824
2wmi_0	Good	0.99	1	Chpi	TRP	No	-687.347	-1129.91	-442.551	-0.0104019	-6.52716
2wmi_1	Good	1.01	1.01	Chpi	TRP	No	-687.354	-1129.91	-442.55	-0.0103556	-6.49813
2wmj_0	Good	1	1.01	Chpi	TRP	No	-687.35	-1129.91	-442.551	-0.00914226	-5.73677
2wmj_1	Good	1	1	Chpi	TRP	No	-687.353	-1129.91	-442.549	-0.00854154	-5.35982
2wmk_1	Good	0.84	1.01	Chpi	TRP	No	-687.348	-1129.91	-442.549	-0.0100417	-6.30118
2wnb_0	Good	0.99	0.95	Chpi	PHE	Yes	-687.348	-998.299	-310.944	-0.00684629	-4.29604
2wnb_0	Good	0.99	0.95	Chpi	TYR	No	-687.348	-1073.54	-386.188	-0.0080941	-5.07905
2wnf_0	Good	0.99	0.97	Chpi	PHE	Yes	-687.35	-998.298	-310.941	-0.00674467	-4.23228
2wnf_0	Good	0.99	0.97	Chpi	TYR	No	-687.35	-1073.54	-386.185	-0.00808765	-5.075
2wsv_0	Good	0.97	0.9	Chpi	TRP	No	-687.355	-1129.91	-442.55	-0.00933805	-5.85963
2wt0_0	Good	0.81	1	Chpi	TRP	No	-687.353	-1129.91	-442.551	-0.00926615	-5.81451
2wt1_1	Good	0.92	1.07	Chpi	PHE	No	-687.353	-998.308	-310.945	-0.00894612	-5.61369
2wt1_1	Good	0.92	1.07	Chpi	TYR	Yes	-687.354	-1073.55	-386.189	-0.009213	-5.78116
2x2t_1	Good	1.01	1.01	Chpi	PHE	Yes	-687.355	-998.309	-310.946	-0.00775009	-4.86318
2x2t_1	Good	1.01	1.01	Chpi	TYR	No	-687.355	-1073.55	-386.189	-0.0090166	-5.65792
2xfe_0	Good	0.91	0.92	Chpi	TRP	No	-687.345	-1129.9	-442.544	-0.00959179	-6.01885
2xon_0	Good	1.01	0.99	Chpi	TRP	No	-687.352	-1129.91	-442.546	-0.0101775	-6.38638
2xon_3	Good	1.01	1.05	Chpi	TRP	No	-687.353	-1129.9	-442.542	-0.009013	-5.65566
2xon_4	Good	1.01	1.05	Chpi	TRP	No	-687.356	-1129.9	-442.542	-0.00339194	-2.12844
2xon_5	Good	0.98	0.99	Chpi	TRP	No	-687.348	-1129.9	-442.542	-0.00850512	-5.33696
2xon_8	Good	0.98	1.05	Chpi	TRP	No	-687.35	-1129.91	-442.546	-0.0092441	-5.80067
2xon_9	Good	0.98	1.05	Chpi	TRP	No	-687.352	-1129.91	-442.546	-0.00810078	-5.08324
2xrs_0	Good	0.85	0.99	Chpi	TRP	No	-687.358	-1129.92	-442.55	-0.0103019	-6.46444
2xrs_1	Good	0.91	0.96	Chpi	TRP	No	-687.353	-1129.91	-442.55	-0.0112809	-7.07877
2xrs_2	Good	0.8	0.88	Chpi	TRP	No	-687.355	-1129.92	-442.546	-0.0153603	-9.6386
2xrs_4	Good	0.85	0.92	Chpi	TRP	No	-687.352	-1129.91	-442.551	-0.0111981	-7.02684
2xrs_5	Good	0.8	1.01	Chpi	TRP	No	-687.353	-1129.91	-442.551	-0.0102322	-6.42073
2xrs_7	Good	0.94	0.9	Chpi	TRP	No	-687.353	-1129.91	-442.551	-0.010508	-6.59376
2y9g_2	Good	0.89	0.91	Chpi	PHE	Yes	-687.346	-998.298	-310.944	-0.00754828	-4.73654
2y9g_2	Good	0.89	0.91	Chpi	TYR	No	-687.346	-1073.54	-386.186	-0.00793177	-4.97719
2y9g_4	Good	0.96	0.97	Chpi	PHE	No	-687.351	-998.301	-310.943	-0.00734085	-4.60638
2y9g_4	Good	0.96	0.97	Chpi	TYR	Yes	-687.348	-1073.54	-386.186	-0.00805281	-5.05314
2yfz_0	Good	0.84	0.95	Chpi	TRP	No	-687.356	-1129.92	-442.551	-0.0125545	-7.87797
2z8d_0	Good	1.05	1.05	Chpi	TRP	No	-687.352	-1129.91	-442.549	-0.0116183	-7.2905
2z8d_1	Good	1.05	1.01	Chpi	TRP	No	-687.349	-1129.91	-442.552	-0.0117439	-7.36933
2z8e_0	Good	1.04	1.03	Chpi	TRP	No	-687.348	-1129.91	-442.551	-0.0113597	-7.12824
2z8e_1	Good	1.04	1	Chpi	TRP	No	-687.354	-1129.92	-442.55	-0.0113042	-7.09337
2z8f_1	Good	1.04	1.04	Chpi	TRP	No	-687.354	-1129.92	-442.552	-0.0117182	-7.35318
2zgo_0	Good	0.9	0.99	Chpi	TRP	No	-687.352	-1129.92	-442.551	-0.0123809	-7.76902
2zhk_0	Good	0.88	0.95	Chpi	TRP	No	-687.35	-1129.91	-442.552	-0.00997504	-6.25934
2zhl_0	Good	0.91	0.99	Chpi	TRP	No	-687.348	-1129.91	-442.55	-0.00989302	-6.20787
2zhl_1	Good	0.81	0.99	Chpi	TRP	No	-687.35	-1129.91	-442.551	-0.0109805	-6.89029
2zhl_2	Good	0.95	1.02	Chpi	TRP	No	-687.347	-1129.91	-442.552	-0.00968451	-6.07703
2zhm_1	Good	1.05	0.99	Chpi	TRP	No	-687.348	-1129.91	-442.55	-0.00969906	-6.08616
2zhm_3	Good	1.05	1.01	Chpi	TRP	No	-687.348	-1129.91	-442.551	-0.0113736	-7.13692
2zhm_4	Good	0.85	0.98	Chpi	TRP	No	-687.35	-1129.91	-442.552	-0.0102661	-6.442
2zhm_5	Good	0.9	0.99	Chpi	TRP	No	-687.348	-1129.91	-442.552	-0.0112319	-7.048
2zhn_0	Good	0.98	0.97	Chpi	TRP	No	-687.35	-1129.91	-442.551	-0.00971628	-6.09696
2zqn_0	Good	1.01	1	Chpi	TRP	No	-687.354	-1129.92	-442.552	-0.0126462	-7.93547
2zqn_2	Good	1.01	1.03	Chpi	TRP	No	-687.352	-1129.92	-442.552	-0.0111475	-6.99506
2zqn_3	Good	0.91	1	Chpi	TRP	No	-687.352	-1129.91	-442.552	-0.0105793	-6.63848
3a23_0	Good	0.92	0.99	Chpi	TRP	No	-687.352	-1129.91	-442.551	-0.0121311	-7.61228
3a23_1	Good	0.87	1.01	Chpi	TRP	No	-687.354	-1129.92	-442.552	-0.00923774	-5.79668
3afk_0	Good	1.02	1	Chpi	TRP	No	-687.354	-1129.92	-442.552	-0.0114808	-7.2042
3afk_1	Good	1.03	0.99	Chpi	TRP	No	-687.354	-1129.92	-442.552	-0.0108187	-6.78875
3ah4_0	Good	0.92	1.03	Chpi	TRP	No	-687.244	-1129.77	-442.513	-0.0129445	-8.12265
3ak0_0	Good	0.84	0.96	Chpi	TRP	No	-687.354	-1129.92	-442.552	-0.0102642	-6.44081
3ak0_1	Good	0.98	1	Chpi	TRP	No	-687.356	-1129.92	-442.552	-0.0105934	-6.64739
3ap6_0	Good	0.89	0.82	Chpi	TRP	No	-687.35	-1129.91	-442.552	-0.0121836	-7.64521
3ap6_1	Good	0.92	0.91	Chpi	TRP	No	-687.357	-1129.92	-442.551	-0.0103335	-6.48425
3ap6_2	Good	0.91	0.89	Chpi	TRP	No	-687.354	-1129.91	-442.55	-0.0101431	-6.36481
3ap6_3	Good	0.95	0.88	Chpi	TRP	No	-687.356	-1129.92	-442.552	-0.0103907	-6.52018
3ap7_0	Good	0.91	1.01	Chpi	TRP	No	-687.353	-1129.91	-442.551	-0.0103302	-6.48222
3ap9_0	Good	0.91	0.94	Chpi	TRP	No	-687.356	-1129.92	-442.551	-0.00877761	-5.50795
3ap9_1	Good	0.91	0.98	Chpi	PHE	Yes	-687.358	-998.313	-310.946	-0.00867482	-5.44345
3ap9_1	Good	0.91	0.98	Chpi	TYR	No	-687.358	-1073.56	-386.19	-0.00924577	-5.80172
3aya_0	Good	0.95	0.98	Chpi	TRP	No	-687.355	-1129.92	-442.551	-0.0100221	-6.28887
3aya_1	Good	0.99	1.03	Chpi	TRP	No	-687.356	-1129.92	-442.552	-0.00945739	-5.93451
3ayc_0	Good	0.91	1.03	Chpi	TRP	No	-687.355	-1129.92	-442.552	-0.0101981	-6.39928
3ayd_0	Good	1.01	0.99	Chpi	TRP	No	-687.354	-1129.92	-442.552	-0.0106308	-6.67085
3aye_0	Good	0.9	1.01	Chpi	TRP	No	-687.351	-1129.91	-442.552	-0.0111979	-7.02669
3aye_1	Good	0.92	1.06	Chpi	TRP	No	-687.352	-1129.91	-442.552	-0.00939032	-5.89243
3e6j_2	Good	1	1.01	Chpi	TRP	No	-687.352	-1129.91	-442.549	-0.0122933	-7.71406
3ef2_0	Good	1.02	1.04	Chpi	TRP	No	-687.353	-1129.91	-442.551	-0.0100259	-6.29125
3ef2_1	Good	1	1.01	Chpi	TRP	No	-687.352	-1129.91	-442.55	-0.00997478	-6.25918
3ef2_2	Good	1.01	1.04	Chpi	TRP	No	-687.353	-1129.91	-442.551	-0.00993153	-6.23204
3ef2_3	Good	0.99	1.01	Chpi	TRP	No	-687.352	-1129.91	-442.55	-0.00994215	-6.2387
3ef2_4	Good	1.02	1.04	Chpi	TRP	No	-687.352	-1129.91	-442.551	-0.00982925	-6.16785
3ef2_5	Good	0.99	1.01	Chpi	TRP	No	-687.352	-1129.91	-442.546	-0.0149759	-9.39737
3ef2_6	Good	1.02	1.05	Chpi	TRP	No	-687.353	-1129.91	-442.551	-0.00982727	-6.16661
3ef2_7	Good	0.99	1.01	Chpi	TRP	No	-687.351	-1129.91	-442.545	-0.0148415	-9.31302
3m3c_0	Good	1.03	1.04	Chpi	TRP	No	-687.354	-1129.92	-442.551	-0.0112282	-7.04567
3m3c_1	Good	1.04	1.02	Chpi	TRP	No	-687.353	-1129.92	-442.552	-0.0106021	-6.65279
3nv3_0	Good	0.84	1	Chpi	TRP	No	-687.356	-1129.92	-442.552	-0.0101149	-6.34713
3sx3_0	Good	0.83	1.04	Chpi	TRP	No	-687.352	-1129.91	-442.547	-0.0122874	-7.71031
3sx8_0	Good	0.99	1.02	Chpi	TRP	No	-687.34	-1129.9	-442.549	-0.0118805	-7.45501
3sxc_0	Good	0.84	0.97	Chpi	TRP	No	-687.351	-1129.91	-442.55	-0.0121223	-7.60675
3sxd_0	Good	0.97	0.99	Chpi	TRP	No	-687.351	-1129.91	-442.55	-0.0123206	-7.7312
3sxe_0	Good	0.92	1.04	Chpi	TRP	No	-687.345	-1129.91	-442.547	-0.012835	-8.05399
3sxg_0	Good	0.89	1.01	Chpi	TRP	No	-687.348	-1129.91	-442.551	-0.0124395	-7.80578
3urm_1	Good	1.01	1.07	Chpi	TRP	No	-687.35	-1129.91	-442.551	-0.00996795	-6.25489
3urm_4	Good	1.01	1.04	Chpi	TRP	No	-687.348	-1129.91	-442.55	-0.0100905	-6.3318
3vv1_0	Good	0.83	1.05	Chpi	TRP	No	-687.352	-1129.91	-442.548	-0.00886604	-5.56344
3vv1_1	Good	1.05	1.02	Chpi	TRP	No	-687.352	-1129.91	-442.548	-0.00898746	-5.63963
3wg1_0	Good	1.04	0.96	Chpi	TRP	No	-687.345	-1129.9	-442.55	-0.00996434	-6.25263
3wg1_1	Good	0.88	0.96	Chpi	TRP	No	-687.322	-1129.88	-442.55	-0.00762724	-4.78609
3wg3_0	Good	0.97	1	Chpi	TRP	No	-687.355	-1129.92	-442.551	-0.0122901	-7.71204
3wg3_1	Good	0.86	1.01	Chpi	TRP	No	-687.355	-1129.92	-442.551	-0.0103572	-6.49915
3wg4_0	Good	0.95	1.03	Chpi	TRP	No	-687.356	-1129.92	-442.55	-0.0100699	-6.31884
3wg4_1	Good	0.91	1.04	Chpi	TRP	No	-687.355	-1129.92	-442.551	-0.0102239	-6.41547
3wkh_0	Good	0.93	1.02	Chpi	TRP	No	-687.328	-1129.89	-442.551	-0.0128837	-8.08452
3wv6_0	Good	0.89	1.01	Chpi	TRP	No	-687.356	-1129.92	-442.552	-0.00959422	-6.02037
3wv6_1	Good	1.03	1.01	Chpi	TRP	No	-687.358	-1129.92	-442.548	-0.0139261	-8.73862
3wv6_2	Good	0.86	0.99	Chpi	TRP	No	-687.354	-1129.91	-442.552	-0.00873621	-5.48197
3wv6_3	Good	1.01	1.03	Chpi	TRP	No	-687.357	-1129.92	-442.552	-0.00964021	-6.04923
4a3x_0	Good	0.95	1.01	Chpi	TRP	No	-687.35	-1129.9	-442.543	-0.00955144	-5.99353
4a41_0	Good	0.96	1	Chpi	PHE	Yes	-687.354	-998.31	-310.948	-0.00836232	-5.24735
4a41_0	Good	0.96	1	Chpi	TYR	No	-687.354	-1073.56	-386.191	-0.00947835	-5.94767
4a4a_0	Good	1.07	1.03	Chpi	TRP	No	-687.35	-1129.91	-442.55	-0.0136893	-8.59007
4af9_0	Good	0.93	1.02	Chpi	TRP	No	-687.355	-1129.91	-442.549	-0.00916494	-5.751
4akb_4	Good	0.96	1	Chpi	PHE	Yes	-687.357	-998.313	-310.947	-0.00951408	-5.97008
4akb_4	Good	0.96	1	Chpi	TYR	No	-687.357	-1073.56	-386.191	-0.0103939	-6.52219
4akb_8	Good	0.92	0.94	Chpi	PHE	Yes	-687.357	-998.314	-310.947	-0.00957773	-6.01002
4akb_8	Good	0.92	0.94	Chpi	TYR	No	-687.357	-1073.56	-386.191	-0.010448	-6.55611
4atf_0	Good	0.96	1.01	Chpi	TRP	No	-687.336	-1129.89	-442.545	-0.0102596	-6.4379
4atf_1	Good	0.92	1.03	Chpi	TRP	No	-687.337	-1129.9	-442.549	-0.00985882	-6.18641
4atf_10	Good	1.02	1.03	Chpi	TRP	No	-687.345	-1129.9	-442.549	-0.0108602	-6.81476
4atf_11	Good	1.03	1.04	Chpi	TRP	No	-687.338	-1129.9	-442.55	-0.00810997	-5.08901
4atf_15	Good	1.02	1.03	Chpi	TRP	No	-687.345	-1129.9	-442.546	-0.00878165	-5.51049
4atf_5	Good	0.99	1.01	Chpi	TRP	No	-687.345	-1129.9	-442.547	-0.00972502	-6.10245
4atf_6	Good	0.98	1.03	Chpi	TRP	No	-687.347	-1129.9	-442.544	-0.0088245	-5.53738
4aw7_1	Good	1.02	0.99	Chpi	TRP	No	-687.357	-1129.92	-442.549	-0.0144552	-9.07061
4aw7_4	Good	1.06	1.03	Chpi	TRP	No	-687.355	-1129.92	-442.55	-0.0117246	-7.35722
4bmb_0	Good	1.01	1.04	Chpi	TRP	No	-687.336	-1129.9	-442.552	-0.0106113	-6.65857
4bme_1	Good	0.91	1.01	Chpi	TRP	No	-687.354	-1129.91	-442.551	-0.0086119	-5.40397
4d3w_0	Good	0.98	1.01	Chpi	TRP	No	-687.357	-1129.92	-442.549	-0.00923443	-5.7946
4d6h_0	Good	0.85	1.02	Chpi	TRP	No	-687.342	-1129.9	-442.55	-0.0103617	-6.50197
4d6i_0	Good	0.96	1.01	Chpi	TRP	No	-687.34	-1129.9	-442.551	-0.0101609	-6.37598
4d6j_0	Good	0.99	0.96	Chpi	TRP	No	-687.341	-1129.9	-442.551	-0.00937703	-5.88408
4d71_0	Good	1.02	1.03	Chpi	TRP	No	-687.345	-1129.9	-442.551	-0.00927048	-5.81723
4f8l_0	Good	1.03	1.04	Chpi	PHE	Yes	-687.358	-998.313	-310.946	-0.00900851	-5.65284
4f8l_0	Good	1.03	1.04	Chpi	TYR	No	-687.358	-1073.56	-386.19	-0.00912647	-5.72686
4fra_0	Good	0.91	1.02	Chpi	TRP	No	-687.345	-1129.9	-442.547	-0.0118381	-7.42844
4frb_0	Good	0.93	1.02	Chpi	TRP	No	-687.345	-1129.9	-442.547	-0.0120481	-7.56016
4frd_0	Good	1	1.04	Chpi	TRP	No	-687.352	-1129.91	-442.546	-0.00855474	-5.3681
4fre_0	Good	0.88	0.92	Chpi	TRP	No	-687.352	-1129.91	-442.551	-0.0119166	-7.47767
4frh_0	Good	0.8	0.95	Chpi	TRP	No	-687.33	-1129.89	-442.55	-0.00601036	-3.7715
4i4s_10	Good	0.99	0.99	Chpi	PHE	Yes	-687.357	-998.314	-310.947	-0.00907676	-5.69567
4i4s_10	Good	0.99	0.99	Chpi	TYR	No	-687.357	-1073.56	-386.191	-0.00944958	-5.92961
4i4s_11	Good	0.99	0.99	Chpi	PHE	Yes	-687.355	-998.312	-310.942	-0.0154173	-9.67433
4i4s_11	Good	0.99	0.99	Chpi	TYR	No	-687.355	-1073.56	-386.191	-0.0105185	-6.60035
4i4s_3	Good	0.92	0.92	Chpi	PHE	Yes	-687.356	-998.311	-310.947	-0.0077657	-4.87297
4i4s_3	Good	0.92	0.92	Chpi	TYR	No	-687.356	-1073.56	-386.191	-0.00818614	-5.1368
4i4s_5	Good	1.01	0.97	Chpi	PHE	Yes	-687.356	-998.311	-310.947	-0.00737837	-4.62993
4i4s_5	Good	1.01	0.97	Chpi	TYR	No	-687.356	-1073.56	-386.191	-0.00768209	-4.82051
4i4s_6	Good	1.01	0.99	Chpi	PHE	Yes	-687.356	-998.311	-310.947	-0.00755677	-4.74187
4i4s_6	Good	1.01	0.99	Chpi	TYR	No	-687.356	-1073.56	-386.191	-0.00767088	-4.81348
4i4x_0	Good	0.95	0.99	Chpi	PHE	Yes	-687.357	-998.311	-310.947	-0.00816837	-5.12565
4i4x_0	Good	0.95	0.99	Chpi	TYR	No	-687.357	-1073.56	-386.191	-0.00836016	-5.246
4i4x_10	Good	0.99	0.98	Chpi	PHE	Yes	-687.353	-998.308	-310.947	-0.00794093	-4.98293
4i4x_10	Good	0.99	0.98	Chpi	TYR	No	-687.353	-1073.55	-386.191	-0.00855015	-5.36522
4i4x_15	Good	0.87	1.02	Chpi	PHE	No	-687.354	-998.311	-310.947	-0.0097489	-6.11743
4i4x_15	Good	0.87	1.02	Chpi	TYR	Yes	-687.357	-1073.56	-386.191	-0.0111615	-7.00387
4i4x_2	Good	1.02	1	Chpi	PHE	Yes	-687.355	-998.309	-310.947	-0.00683006	-4.28586
4i4x_2	Good	1.02	1	Chpi	TYR	No	-687.355	-1073.55	-386.191	-0.00760681	-4.77327
4i4x_5	Good	0.84	0.96	Chpi	PHE	Yes	-687.355	-998.31	-310.942	-0.0128341	-8.05338
4i4x_5	Good	0.84	0.96	Chpi	TYR	No	-687.355	-1073.55	-386.191	-0.00809403	-5.079
4i4x_7	Good	1.02	1	Chpi	PHE	No	-687.358	-998.313	-310.947	-0.00846821	-5.3138
4i4x_7	Good	1.02	1	Chpi	TYR	Yes	-687.359	-1073.56	-386.191	-0.00986886	-6.19271
4i4x_8	Good	1.02	1.01	Chpi	PHE	Yes	-687.357	-998.312	-310.947	-0.00785773	-4.93072
4i4x_8	Good	1.02	1.01	Chpi	TYR	No	-687.357	-1073.56	-386.191	-0.00825983	-5.18304
4i4y_1	Good	0.98	0.99	Chpi	PHE	Yes	-687.355	-998.31	-310.948	-0.00802152	-5.0335
4i4y_1	Good	0.98	0.99	Chpi	TYR	No	-687.355	-1073.55	-386.191	-0.00856042	-5.37166
4i4y_12	Good	1	0.98	Chpi	PHE	Yes	-687.355	-998.31	-310.947	-0.00781834	-4.90601
4i4y_12	Good	1	0.98	Chpi	TYR	No	-687.355	-1073.55	-386.191	-0.0080594	-5.05727
4i4y_14	Good	0.82	1	Chpi	PHE	No	-687.355	-998.311	-310.947	-0.00834872	-5.23882
4i4y_14	Good	0.82	1	Chpi	TYR	Yes	-687.357	-1073.56	-386.191	-0.00872754	-5.47653
4i4y_4	Good	1.01	0.9	Chpi	PHE	Yes	-687.355	-998.31	-310.947	-0.00781536	-4.90414
4i4y_4	Good	1.01	0.9	Chpi	TYR	No	-687.355	-1073.55	-386.191	-0.00809676	-5.08071
4i4y_6	Good	1	1	Chpi	PHE	No	-687.354	-998.308	-310.947	-0.00676482	-4.24493
4i4y_6	Good	1	1	Chpi	TYR	Yes	-687.357	-1073.56	-386.19	-0.00851683	-5.34431
4i4y_7	Good	1	1	Chpi	PHE	Yes	-687.354	-998.309	-310.947	-0.00751518	-4.71578
4i4y_7	Good	1	1	Chpi	TYR	No	-687.354	-1073.55	-386.191	-0.00816453	-5.12324
4i4y_9	Good	0.97	0.95	Chpi	PHE	Yes	-687.354	-998.309	-310.947	-0.00782172	-4.90813
4i4y_9	Good	0.97	0.95	Chpi	TYR	No	-687.354	-1073.55	-386.191	-0.00849983	-5.33364
4iyb_0	Good	1.05	1.05	Chpi	PHE	Yes	-687.353	-998.306	-310.945	-0.00779305	-4.89014
4iyb_0	Good	1.05	1.05	Chpi	TYR	No	-687.353	-1073.55	-386.189	-0.00847058	-5.31529
4kzk_0	Good	1.02	1.03	Chpi	TRP	No	-687.355	-1129.91	-442.548	-0.00800568	-5.02357
4l6t_0	Good	1.02	1.05	Chpi	TRP	No	-687.358	-1129.92	-442.55	-0.0115439	-7.24379
4l6t_1	Good	0.97	1.07	Chpi	TRP	No	-687.355	-1129.92	-442.55	-0.0116343	-7.30055
4l6t_2	Good	0.93	1.05	Chpi	TRP	No	-687.356	-1129.92	-442.551	-0.0117105	-7.34831
4l6t_3	Good	0.98	1.07	Chpi	TRP	No	-687.355	-1129.92	-442.55	-0.0115766	-7.26431
4l6t_4	Good	0.89	1.01	Chpi	TRP	No	-687.356	-1129.92	-442.55	-0.0113313	-7.11042
4lbk_0	Good	0.9	1.02	Chpi	TRP	No	-687.349	-1129.91	-442.551	-0.0103726	-6.50881
4lks_0	Good	0.82	0.97	Chpi	PHE	Yes	-687.359	-998.313	-310.946	-0.00865713	-5.43235
4lks_0	Good	0.82	0.97	Chpi	TYR	No	-687.359	-1073.56	-386.19	-0.00937176	-5.88078
4lks_1	Good	0.82	0.94	Chpi	PHE	Yes	-687.359	-998.313	-310.945	-0.008854	-5.55589
4lks_1	Good	0.82	0.94	Chpi	TYR	No	-687.359	-1073.56	-386.19	-0.00957203	-6.00645
4no4_0	Good	0.97	1.02	Chpi	TRP	No	-687.351	-1129.91	-442.55	-0.0093289	-5.85389
4no4_1	Good	0.97	0.98	Chpi	TRP	No	-687.35	-1129.91	-442.55	-0.011108	-6.97027
4no4_2	Good	0.98	1.02	Chpi	TRP	No	-687.35	-1129.91	-442.55	-0.00983493	-6.17142
4no4_3	Good	0.97	1.01	Chpi	TRP	No	-687.35	-1129.91	-442.55	-0.0104352	-6.54811
4no4_4	Good	1	0.98	Chpi	TRP	No	-687.351	-1129.91	-442.551	-0.00959519	-6.02098
4no4_5	Good	0.94	1.01	Chpi	TRP	No	-687.352	-1129.91	-442.55	-0.0096394	-6.04872
4ouj_1	Good	0.92	1.03	Chpi	PHE	No	-687.346	-998.3	-310.946	-0.00730215	-4.5821
4ouj_1	Good	0.92	1.03	Chpi	TYR	Yes	-687.344	-1073.54	-386.19	-0.0108063	-6.78098
4ouj_3	Good	0.88	1.04	Chpi	PHE	No	-687.35	-998.301	-310.944	-0.00748509	-4.69689
4ouj_3	Good	0.88	1.04	Chpi	TYR	Yes	-687.349	-1073.55	-386.188	-0.00868507	-5.44988
4q26_0	Good	0.96	1.04	Chpi	TRP	No	-687.346	-1129.91	-442.551	-0.00949153	-5.95594
4q26_1	Good	1.06	1.05	Chpi	TRP	No	-687.34	-1129.9	-442.547	-0.00952817	-5.97893
4q26_2	Good	0.92	1.03	Chpi	TRP	No	-687.344	-1129.91	-442.551	-0.0101226	-6.35195
4q26_3	Good	1.04	1.03	Chpi	TRP	No	-687.348	-1129.91	-442.55	-0.00931584	-5.84569
4rm0_0	Good	0.89	1	Chpi	TRP	No	-687.344	-1129.91	-442.551	-0.0122887	-7.71113
4rm0_1	Good	0.96	0.99	Chpi	TRP	No	-687.348	-1129.91	-442.551	-0.0102594	-6.43778
4wv8_0	Good	1.01	1.04	Chpi	PHE	No	-687.359	-998.313	-310.947	-0.00801194	-5.02749
4wv8_0	Good	1.01	1.04	Chpi	TYR	Yes	-687.357	-1073.56	-386.19	-0.0110824	-6.95421
4wv8_1	Good	0.93	1.02	Chpi	PHE	No	-687.35	-998.302	-310.945	-0.00794351	-4.98455
4wv8_1	Good	0.93	1.02	Chpi	TYR	Yes	-687.348	-1073.55	-386.189	-0.0083515	-5.24057
4wv8_2	Good	0.86	0.99	Chpi	PHE	No	-687.358	-998.311	-310.944	-0.00828673	-5.19992
4wv8_2	Good	0.86	0.99	Chpi	TYR	Yes	-687.359	-1073.56	-386.188	-0.00818281	-5.13471
4wv8_3	Good	0.94	0.97	Chpi	PHE	No	-687.357	-998.31	-310.945	-0.00758407	-4.759
4wv8_3	Good	0.94	0.97	Chpi	TYR	Yes	-687.356	-1073.55	-386.189	-0.00853668	-5.35677
4wvv_0	Good	1.02	1.03	Chpi	TRP	No	-687.352	-1129.91	-442.55	-0.00981776	-6.16064
4wvw_0	Good	1.02	1.03	Chpi	TRP	No	-687.343	-1129.9	-442.551	-0.01011	-6.34405
4wwh_1	Good	0.95	0.93	Chpi	TRP	No	-687.353	-1129.91	-442.549	-0.00846369	-5.31097
4wwh_4	Good	0.93	0.89	Chpi	TRP	No	-687.352	-1129.91	-442.548	-0.0101216	-6.35131
4xbl_0	Good	0.82	1.01	Chpi	TRP	No	-687.353	-1129.91	-442.55	-0.00841731	-5.28187
4xbl_1	Good	0.81	0.98	Chpi	TRP	No	-687.358	-1129.92	-442.551	-0.0071348	-4.47709
4y1y_1	Good	0.82	0.97	Chpi	TRP	No	-687.354	-1129.91	-442.551	-0.00766278	-4.80839
4yg6_1	Good	0.83	0.97	Chpi	PHE	Yes	-687.358	-998.311	-310.947	-0.0058032	-3.64151
4yg6_1	Good	0.83	0.97	Chpi	TYR	No	-687.358	-1073.56	-386.191	-0.00719815	-4.51684
4yg6_2	Good	0.82	0.99	Chpi	PHE	Yes	-687.355	-998.308	-310.947	-0.00638661	-4.0076
4yg6_2	Good	0.82	0.99	Chpi	TYR	No	-687.355	-1073.55	-386.19	-0.00761193	-4.77649
4yg6_3	Good	0.95	0.97	Chpi	PHE	Yes	-687.356	-998.309	-310.946	-0.00611472	-3.83699
4yg6_3	Good	0.95	0.97	Chpi	TYR	No	-687.356	-1073.55	-386.19	-0.00730166	-4.58179
4ym3_0	Good	0.89	0.98	Chpi	TRP	No	-687.358	-1129.92	-442.552	-0.00987299	-6.1953
4ym3_1	Good	0.9	0.98	Chpi	TRP	No	-687.353	-1129.91	-442.552	-0.00872226	-5.47322
4ym3_2	Good	0.9	0.97	Chpi	TRP	No	-687.354	-1129.91	-442.552	-0.00945498	-5.933
4z0n_1	Good	1.07	1.04	Chpi	TRP	No	-687.352	-1129.92	-442.551	-0.0121051	-7.59595
4z3e_0	Good	0.93	1.04	Chpi	TRP	No	-687.342	-1129.9	-442.545	-0.0108163	-6.78725
4z3g_0	Good	1.06	1.06	Chpi	TRP	No	-687.359	-1129.92	-442.549	-0.00973098	-6.10619
4z3g_1	Good	1.09	1.06	Chpi	TRP	No	-687.353	-1129.92	-442.55	-0.0117796	-7.39172
4z3h_0	Good	1.03	1.04	Chpi	TRP	No	-687.354	-1129.92	-442.552	-0.00992381	-6.22719
5a57_0	Good	1.01	1	Chpi	TRP	No	-687.354	-1129.91	-442.549	-0.00900779	-5.65239
5a58_0	Good	1.04	1.05	Chpi	TRP	No	-687.355	-1129.91	-442.55	-0.00950771	-5.96609
5a5a_0	Good	1.04	1.05	Chpi	TRP	No	-687.354	-1129.91	-442.55	-0.00981479	-6.15878
5ca3_1	Good	0.86	1	Chpi	TRP	No	-687.351	-1129.91	-442.55	-0.0106367	-6.67455
5ca3_3	Good	1.01	1.01	Chpi	TRP	No	-687.353	-1129.91	-442.551	-0.0108332	-6.79782
5cbl_1	Good	0.94	0.96	Chpi	TRP	No	-687.351	-1129.91	-442.551	-0.00936516	-5.87664
5cjz_1	Good	1.03	1.03	Chpi	PHE	Yes	-687.358	-998.311	-310.945	-0.00896764	-5.6272
5cjz_1	Good	1.03	1.03	Chpi	TYR	No	-687.358	-1073.56	-386.189	-0.00946895	-5.94177
5d61_0	Good	1.09	1.09	Chpi	TRP	No	-687.349	-1129.91	-442.549	-0.0098659	-6.19085
5d62_0	Good	1.07	1.07	Chpi	TRP	No	-687.348	-1129.91	-442.548	-0.00997237	-6.25766
5d63_0	Good	1.07	1.06	Chpi	TRP	No	-687.347	-1129.91	-442.55	-0.0101725	-6.38325
5duv_0	Good	0.95	1.02	Chpi	TRP	No	-687.353	-1129.91	-442.551	-0.0102623	-6.43959
5duv_1	Good	0.87	1.02	Chpi	TRP	No	-687.357	-1129.92	-442.55	-0.00947026	-5.94259
5duv_2	Good	0.98	0.99	Chpi	TRP	No	-687.353	-1129.91	-442.551	-0.0105788	-6.63818
5duv_3	Good	0.99	1.01	Chpi	TRP	No	-687.355	-1129.92	-442.55	-0.0104923	-6.58394
5dux_0	Good	0.89	1.02	Chpi	TRP	No	-687.356	-1129.92	-442.551	-0.00973658	-6.1097
5dvj_1	Good	1.03	1.01	Chpi	TRP	No	-687.346	-1129.9	-442.548	-0.0105489	-6.61944
5dvj_3	Good	1.03	1.01	Chpi	TRP	No	-687.348	-1129.9	-442.538	-0.0149568	-9.38538
5e1q_0	Good	1.04	1.02	Chpi	TRP	No	-687.351	-1129.91	-442.55	-0.0132284	-8.30085
5e1q_1	Good	1.04	1.07	Chpi	TRP	No	-687.355	-1129.92	-442.551	-0.0122637	-7.69545
5elb_2	Good	1.01	1.02	Chpi	TRP	No	-687.353	-1129.91	-442.546	-0.0115351	-7.23829
5elb_3	Good	0.97	1.05	Chpi	TRP	No	-687.357	-1129.91	-442.545	-0.0115272	-7.23333
5elb_4	Good	1.02	1.05	Chpi	TRP	No	-687.354	-1129.91	-442.546	-0.0119236	-7.48205
5elb_7	Good	0.99	1.05	Chpi	TRP	No	-687.355	-1129.91	-442.547	-0.011473	-7.19934
5elb_8	Good	0.96	1.03	Chpi	TRP	No	-687.355	-1129.91	-442.547	-0.0117319	-7.36178
5elb_9	Good	0.95	1.01	Chpi	TRP	No	-687.356	-1129.91	-442.544	-0.0115793	-7.26601
5eld_2	Good	0.87	1.05	Chpi	TRP	No	-687.354	-1129.91	-442.548	-0.0114638	-7.19355
5gqf_0	Good	0.99	1.02	Chpi	TRP	No	-687.349	-1129.9	-442.543	-0.00857936	-5.38355
5gqf_1	Good	0.96	0.97	Chpi	TRP	No	-687.35	-1129.91	-442.547	-0.0143582	-9.00976
5jop_0	Good	0.85	1.03	Chpi	PHE	Yes	-687.35	-998.305	-310.946	-0.00875377	-5.49299
5jop_0	Good	0.85	1.03	Chpi	TYR	No	-687.35	-1073.55	-386.189	-0.00911268	-5.71821
5jop_2	Good	1.03	1.03	Chpi	PHE	Yes	-687.353	-998.307	-310.946	-0.00829303	-5.20388
5jop_2	Good	1.03	1.03	Chpi	TYR	No	-687.353	-1073.55	-386.19	-0.00849877	-5.33298
5jpv_0	Good	0.83	1.04	Chpi	TRP	No	-687.353	-1129.91	-442.55	-0.00977502	-6.13383
5ln8_0	Good	0.92	1	Chpi	TRP	No	-687.356	-1129.91	-442.549	-0.00994419	-6.23998
5ln8_1	Good	0.92	1.02	Chpi	PHE	Yes	-687.356	-998.307	-310.946	-0.00441687	-2.77159
5ln8_1	Good	0.92	1.02	Chpi	TYR	No	-687.356	-1073.55	-386.191	-0.00619098	-3.88484
5mxh_0	Good	1.03	0.98	Chpi	TRP	No	-687.35	-1129.91	-442.55	-0.0118656	-7.44566
5mxh_2	Good	0.94	0.97	Chpi	TRP	No	-687.352	-1129.91	-442.545	-0.0137336	-8.61783
5nf7_0	Good	0.92	1.03	Chpi	TRP	No	-687.345	-1129.89	-442.537	-0.0112479	-7.05807
5nld_0	Good	0.89	0.95	Chpi	TRP	No	-687.337	-1129.9	-442.551	-0.0105564	-6.62411
5nle_0	Good	0.94	1.04	Chpi	TRP	No	-687.352	-1129.91	-442.552	-0.0105249	-6.60436
5nle_2	Good	0.86	0.99	Chpi	TRP	No	-687.352	-1129.91	-442.552	-0.00712387	-4.47023
5nle_3	Good	0.84	0.99	Chpi	TRP	No	-687.352	-1129.91	-442.551	-0.0104966	-6.58661
5nlh_0	Good	0.89	0.97	Chpi	TRP	No	-687.354	-1129.91	-442.55	-0.0101974	-6.39888
5nmj_0	Good	0.9	1	Chpi	TRP	No	-687.352	-1129.91	-442.551	-0.0101829	-6.38976
5nre_0	Good	0.93	0.93	Chpi	TRP	No	-687.353	-1129.92	-442.551	-0.0121818	-7.64406
5t7i_0	Good	0.89	0.98	Chpi	TRP	No	-687.356	-1129.92	-442.551	-0.00983756	-6.17307
5t7i_1	Good	0.89	1	Chpi	PHE	Yes	-687.358	-998.312	-310.946	-0.00831331	-5.2166
5t7i_1	Good	0.89	1	Chpi	TYR	No	-687.358	-1073.56	-386.19	-0.00907821	-5.69658
5t7s_0	Good	0.88	1.03	Chpi	TRP	No	-687.356	-1129.92	-442.552	-0.0100472	-6.30465
5t7t_0	Good	0.85	1.01	Chpi	TRP	No	-687.356	-1129.92	-442.552	-0.00922376	-5.78791
5ta0_0	Good	0.88	0.99	Chpi	TRP	No	-687.354	-1129.91	-442.549	-0.0107526	-6.74723
5ufc_5	Good	1.01	0.98	Chpi	TRP	No	-687.345	-1129.91	-442.551	-0.0121289	-7.61087
5zvc_0	Good	0.83	1.04	Chpi	TRP	No	-687.344	-1129.91	-442.551	-0.0122481	-7.68571
5zvc_1	Good	0.88	1.03	Chpi	TRP	No	-687.334	-1129.9	-442.551	-0.0109882	-6.89509
6e20_0	Good	1.04	1.02	Chpi	TRP	No	-687.35	-1129.91	-442.551	-0.0103793	-6.51303
6e20_1	Good	1.03	1.03	Chpi	TRP	No	-687.352	-1129.91	-442.549	-0.0106368	-6.67461
6eui_0	Good	1.03	1	Chpi	TRP	No	-687.354	-1129.91	-442.551	-0.00818794	-5.13793
6fk2_0	Good	0.82	1.03	Chpi	TRP	No	-687.354	-1129.91	-442.55	-0.0100395	-6.2998
6gpa_1	Good	0.91	1.01	Chpi	TRP	No	-687.351	-1129.91	-442.55	-0.0101434	-6.36498
6gt9_0	Good	1.01	0.96	Chpi	PHE	Yes	-687.356	-998.312	-310.947	-0.00920343	-5.77515
6gt9_0	Good	1.01	0.96	Chpi	TYR	No	-687.356	-1073.56	-386.191	-0.00910792	-5.71522
6gt9_2	Good	1.04	1.02	Chpi	PHE	Yes	-687.356	-998.309	-310.946	-0.00689423	-4.32613
6gt9_2	Good	1.04	1.02	Chpi	TYR	No	-687.356	-1073.55	-386.19	-0.00743651	-4.66641
6gt9_4	Good	1.02	0.98	Chpi	PHE	Yes	-687.357	-998.312	-310.945	-0.00952702	-5.9782
6gt9_4	Good	1.02	0.98	Chpi	TYR	No	-687.357	-1073.56	-386.19	-0.00949435	-5.9577
6gt9_6	Good	0.99	0.96	Chpi	PHE	Yes	-687.36	-998.313	-310.946	-0.00694193	-4.35606
6gt9_6	Good	0.99	0.96	Chpi	TYR	No	-687.36	-1073.56	-386.191	-0.00736995	-4.62464
6h0h_3	Good	1.04	1.03	Chpi	TRP	No	-687.358	-1129.92	-442.55	-0.0114276	-7.17082
6h0h_8	Good	1.04	1.01	Chpi	TRP	No	-687.359	-1129.92	-442.55	-0.0114749	-7.20049
6hmy_0	Good	1.05	1.03	Chpi	TRP	No	-687.359	-1129.92	-442.55	-0.0109182	-6.85114
6hmy_3	Good	1	1.03	Chpi	TRP	No	-687.353	-1129.91	-442.547	-0.0107288	-6.73234
6hmy_4	Good	1.05	1.02	Chpi	TRP	No	-687.352	-1129.91	-442.547	-0.0114472	-7.18314
6hmy_5	Good	1.05	1.03	Chpi	TRP	No	-687.352	-1129.91	-442.549	-0.0111862	-7.01936
6hmy_8	Good	1.03	1.01	Chpi	TRP	No	-687.354	-1129.91	-442.549	-0.0115107	-7.22299
6hmy_9	Good	0.97	1.01	Chpi	TRP	No	-687.352	-1129.91	-442.548	-0.011351	-7.12273
6hur_1	Good	1.01	1.05	Chpi	TRP	No	-687.351	-1129.91	-442.55	-0.0114012	-7.15428
6ial_0	Good	0.95	1	Chpi	TRP	No	-687.357	-1129.92	-442.549	-0.0101868	-6.3922
6ial_1	Good	0.96	0.99	Chpi	TRP	No	-687.356	-1129.92	-442.549	-0.0113143	-7.09973
6jys_0	Good	0.96	1.02	Chpi	TRP	No	-687.355	-1129.92	-442.551	-0.0121249	-7.60839
6jys_1	Good	1.02	1.02	Chpi	TRP	No	-687.362	-1129.92	-442.551	-0.0113097	-7.09686
6jys_2	Good	0.85	1.03	Chpi	TRP	No	-687.362	-1129.92	-442.551	-0.0113921	-7.14853
6kqs_0	Good	1.04	1.07	Chpi	TRP	No	-687.348	-1129.91	-442.549	-0.00819183	-5.14037
6kqt_0	Good	0.97	1.05	Chpi	TRP	No	-687.351	-1129.91	-442.551	-0.00637344	-3.99933
6l67_0	Good	0.91	1	Chpi	TRP	No	-687.343	-1129.91	-442.551	-0.0122121	-7.66308
6lf2_1	Good	0.9	1.03	Chpi	PHE	Yes	-687.361	-998.314	-310.946	-0.00740468	-4.64643
6lf2_1	Good	0.9	1.03	Chpi	TYR	No	-687.361	-1073.56	-386.19	-0.00727186	-4.56309
6lf2_2	Good	0.96	1.02	Chpi	PHE	No	-687.352	-998.305	-310.946	-0.00703339	-4.41345
6lf2_2	Good	0.96	1.02	Chpi	TYR	Yes	-687.355	-1073.55	-386.19	-0.00346038	-2.17139
6n1b_0	Good	0.9	1.01	Chpi	PHE	Yes	-687.341	-998.293	-310.944	-0.00814574	-5.11145
6n1b_0	Good	0.9	1.01	Chpi	TYR	No	-687.341	-1073.54	-386.186	-0.00828302	-5.1976
6orf_0	Good	1.03	0.92	Chpi	TRP	No	-687.349	-1129.91	-442.549	-0.0116005	-7.27929
6orh_0	Good	1.07	1.05	Chpi	TRP	No	-687.354	-1129.92	-442.549	-0.0130105	-8.16406
6orh_1	Good	1.05	1.05	Chpi	TRP	No	-687.352	-1129.92	-442.55	-0.0141388	-8.87208
6qub_0	Good	1.01	0.96	Chpi	TRP	No	-687.356	-1129.91	-442.549	-0.00855954	-5.37111
6qub_1	Good	0.95	0.95	Chpi	TRP	No	-687.355	-1129.91	-442.55	-0.0089355	-5.60702
6ug7_0	Good	1.03	1.07	Chpi	PHE	Yes	-687.352	-998.297	-310.938	-0.00556664	-3.49307
6ug7_0	Good	1.03	1.07	Chpi	TYR	No	-687.354	-1073.54	-386.179	-0.00657328	-4.12473
6ug8_0	Good	1	1.02	Chpi	PHE	Yes	-687.35	-998.301	-310.946	-0.00516564	-3.24144
6ug8_0	Good	1	1.02	Chpi	TYR	No	-687.346	-1073.54	-386.189	-0.00622403	-3.90558
6v1c_0	Good	1.03	1.08	Chpi	TRP	No	-687.355	-1129.92	-442.55	-0.0134417	-8.43467
6zjq_0	Good	1.07	1.09	Chpi	TRP	No	-687.356	-1129.91	-442.544	-0.010794	-6.77325
6zjr_1	Good	0.97	1.03	Chpi	TRP	No	-687.344	-1129.9	-442.546	-0.0111054	-6.96861
7cwd_2	Good	0.96	1.06	Chpi	TRP	No	-687.322	-1129.88	-442.55	-0.0113895	-7.1469

## Sheet: Hbond
PDB ID	EDIA	GAL_EDIA	AA_EDIA	Type	AA	Converted?	Galactose (a.u.)	Close Contact Pair (a.u.)	Amino Acid (a.u.)	Interaction Energy (a.u.)	Interaction Energy (kcal/mol)
2b3f_0	Good	1.08	1.07	Hbond	TRP	No	-687.352	-1129.91	-442.548	-0.00731743	-4.59169
2b3f_10	Good	1.05	1.08	Hbond	TRP	No	-687.35	-1129.91	-442.549	-0.00740652	-4.64759
2b3f_2	Good	1.06	1.07	Hbond	TRP	No	-687.352	-1129.91	-442.548	-0.00703493	-4.41442
2b3f_4	Good	1.05	1.08	Hbond	TRP	No	-687.352	-1129.91	-442.549	-0.0073112	-4.58778
2b3f_6	Good	1.07	1.07	Hbond	TRP	No	-687.349	-1129.9	-442.549	-0.00714733	-4.48495
2b3f_8	Good	1.07	1.08	Hbond	TRP	No	-687.352	-1129.91	-442.55	-0.00779712	-4.89269
2cdo_3	Good	1.04	1.04	Hbond	TYR	No	-687.348	-1073.54	-386.185	-0.00454836	-2.8541
2ead_0	Good	0.83	1.03	Hbond	TRP	No	-687.349	-1129.9	-442.549	-0.00593672	-3.72529
2wn2_0	Good	0.97	1.03	Hbond	TRP	No	-687.354	-1129.91	-442.55	-0.00828374	-5.19804
2wn2_2	Good	0.95	1.02	Hbond	TRP	No	-687.358	-1129.92	-442.551	-0.00884155	-5.54807
2wn2_4	Good	0.99	1.01	Hbond	TRP	No	-687.359	-1129.92	-442.549	-0.00917152	-5.75513
2wnb_2	Good	0.99	0.97	Hbond	TYR	No	-687.349	-1073.54	-386.184	-0.00819932	-5.14507
2wnf_2	Good	0.99	0.99	Hbond	TYR	No	-687.349	-1073.54	-386.186	-0.00773805	-4.85563
2yfz_1	Good	0.84	1.04	Hbond	TYR	No	-687.356	-1073.55	-386.191	-0.00668508	-4.19489
3ilf_0	Good	0.83	0.96	Hbond	TRP	No	-687.338	-1129.89	-442.547	-0.00716548	-4.49634
3urm_0	Good	1.01	1.02	Hbond	TRP	No	-687.349	-1129.91	-442.551	-0.00760525	-4.7723
3urm_3	Good	1.01	0.96	Hbond	TRP	No	-687.348	-1129.91	-442.551	-0.00718345	-4.50762
4wwh_3	Good	0.93	0.91	Hbond	TRP	No	-687.352	-1129.91	-442.549	-0.00647838	-4.06518
5ca3_0	Good	0.86	0.99	Hbond	TRP	No	-687.358	-1129.92	-442.551	-0.00937432	-5.88239
5ca3_2	Good	1.01	0.97	Hbond	TRP	No	-687.358	-1129.92	-442.549	-0.00945615	-5.93373
5dvj_0	Good	1.03	1.02	Hbond	TRP	No	-687.348	-1129.9	-442.543	-0.00985849	-6.1862
5dvj_2	Good	1.03	1.01	Hbond	TRP	No	-687.345	-1129.9	-442.545	-0.00581651	-3.64986
5mxh_1	Good	1.03	1.02	Hbond	TRP	No	-687.348	-1129.9	-442.544	-0.00541027	-3.39495
5mxh_3	Good	0.94	1.04	Hbond	TRP	No	-687.352	-1129.9	-442.548	-0.00343778	-2.15721
5mxh_5	Good	0.87	0.97	Hbond	TRP	No	-687.339	-1129.89	-442.547	-0.00614548	-3.85629
6gt9_1	Good	1.01	1	Hbond	TRP	No	-687.359	-1129.91	-442.548	-0.00495088	-3.10668
6gt9_3	Good	1.04	1.03	Hbond	TRP	No	-687.357	-1129.91	-442.547	-0.0043764	-2.74619
6gt9_5	Good	1.02	1.04	Hbond	TRP	No	-687.359	-1129.91	-442.55	-0.0052629	-3.30247
6gt9_7	Good	0.99	0.99	Hbond	TRP	No	-687.36	-1129.92	-442.55	-0.00485436	-3.04611
6h0h_0	Good	1.04	1.02	Hbond	TRP	No	-687.352	-1129.91	-442.55	-0.00771025	-4.83818
6h0h_2	Good	1.04	1.02	Hbond	TRP	No	-687.351	-1129.91	-442.549	-0.0078745	-4.94125
6h0h_5	Good	1.04	1.02	Hbond	TRP	No	-687.353	-1129.91	-442.55	-0.00657276	-4.12441
6h0h_7	Good	1.04	1.02	Hbond	TRP	No	-687.356	-1129.91	-442.549	-0.00756735	-4.74851

## Sheet: Other
PDB ID	EDIA	GAL_EDIA	AA_EDIA	Type	AA	Converted?	Galactose (a.u.)	Close Contact Pair (a.u.)	Amino Acid (a.u.)	Interaction Energy (a.u.)	Interaction Energy (kcal/mol)
1gca_0	Good	1	1.04	Other	PHE	No	-687.351	-998.298	-310.945	-0.00282652	-1.77364
1gca_0	Good	1	1.04	Other	TYR	Yes	-687.351	-1073.54	-386.187	-0.00296128	-1.8582
1jyn_0	Good	0.97	0.99	Other	PHE	Yes	-687.351	-998.299	-310.946	-0.00229285	-1.43876
1jyn_0	Good	0.97	0.99	Other	TYR	No	-687.349	-1073.54	-386.19	-0.00293501	-1.84172
1jyn_1	Good	0.97	1	Other	TRP	No	-687.352	-1129.9	-442.546	-0.00340229	-2.13494
1jyn_2	Good	0.97	1.03	Other	TRP	No	-687.352	-1129.9	-442.543	-0.00638077	-4.00393
1jyn_3	Good	0.98	1.02	Other	PHE	Yes	-687.352	-998.3	-310.946	-0.00236635	-1.48489
1jyn_3	Good	0.98	1.02	Other	TYR	No	-687.346	-1073.54	-386.19	-0.0031206	-1.95818
1jyn_4	Good	0.98	1.03	Other	TRP	No	-687.354	-1129.9	-442.548	-0.00328052	-2.05853
1jyn_6	Good	0.95	1.02	Other	PHE	Yes	-687.354	-998.303	-310.946	-0.00255457	-1.60299
1jyn_6	Good	0.95	1.02	Other	TYR	No	-687.349	-1073.54	-386.189	-0.00304906	-1.91329
1jyn_8	Good	0.95	1.01	Other	PHE	Yes	-687.354	-998.302	-310.946	-0.00246956	-1.54965
1jyn_8	Good	0.95	1.01	Other	TYR	No	-687.351	-1073.54	-386.19	-0.00284323	-1.78413
1jyn_9	Good	0.95	1.02	Other	TRP	No	-687.353	-1129.91	-442.546	-0.00676971	-4.24799
1jz7_1	Good	0.85	0.92	Other	TRP	No	-687.356	-1129.91	-442.548	-0.00121773	-0.764123
1jz7_10	Good	0.93	1.02	Other	PHE	No	-687.35	-998.301	-310.947	-0.00474573	-2.97794
1jz7_10	Good	0.93	1.02	Other	TYR	Yes	-687.344	-1073.54	-386.19	-0.00480283	-3.01378
1jz7_2	Good	0.85	1	Other	PHE	No	-687.355	-998.301	-310.941	-0.004408	-2.76602
1jz7_2	Good	0.85	1	Other	TYR	Yes	-687.353	-1073.54	-386.185	-0.00309522	-1.94225
1jz7_3	Good	0.94	0.94	Other	TRP	No	-687.337	-1129.88	-442.538	-0.00750269	-4.70794
1m26_0	Good	0.96	1.03	Other	PHE	Yes	-687.318	-998.268	-310.947	-0.00289701	-1.81788
1m26_0	Good	0.96	1.03	Other	TYR	No	-687.316	-1073.51	-386.191	-0.003111	-1.95215
1m26_1	Good	0.95	1	Other	PHE	Yes	-687.315	-998.266	-310.942	-0.00906537	-5.68852
1m26_1	Good	0.95	1	Other	TYR	No	-687.313	-1073.51	-386.191	-0.00407157	-2.55491
1m26_2	Good	0.94	1.03	Other	PHE	Yes	-687.314	-998.265	-310.947	-0.0035584	-2.2329
1m26_2	Good	0.94	1.03	Other	TYR	No	-687.314	-1073.51	-386.192	-0.00362957	-2.27755
1oko_0	Good	0.94	0.96	Other	PHE	Yes	-687.346	-998.296	-310.946	-0.00394909	-2.47805
1oko_0	Good	0.94	0.96	Other	TYR	No	-687.347	-1073.54	-386.19	-0.00444507	-2.78928
1s0i_0	Good	1.02	1.05	Other	PHE	Yes	-687.357	-998.305	-310.945	-0.00298115	-1.87067
1s0i_0	Good	1.02	1.05	Other	TYR	No	-687.357	-1073.55	-386.189	-0.00306942	-1.92606
1s0i_1	Good	1.02	1.06	Other	TRP	No	-687.356	-1129.91	-442.55	-0.0053746	-3.37256
1ubz_0	Good	0.88	0.88	Other	PHE	Yes	-687.356	-998.309	-310.947	-0.00647182	-4.06107
1ubz_0	Good	0.88	0.88	Other	TYR	No	-687.356	-1073.55	-386.189	-0.0069794	-4.37958
1ugw_1	Good	1.01	1.05	Other	PHE	Yes	-687.354	-998.31	-310.947	-0.00966978	-6.06779
1ugw_1	Good	1.01	1.05	Other	TYR	No	-687.354	-1073.55	-386.191	-0.0096922	-6.08185
1ugw_2	Good	1.01	1.06	Other	TRP	No	-687.35	-1129.9	-442.55	-0.00342359	-2.1483
1ugw_4	Good	0.83	0.87	Other	PHE	Yes	-687.348	-998.302	-310.946	-0.00802061	-5.03293
1ugw_4	Good	0.83	0.87	Other	TYR	No	-687.348	-1073.55	-386.19	-0.00816763	-5.12519
1ugw_5	Good	0.83	1.04	Other	TRP	No	-687.348	-1129.9	-442.55	-0.00260236	-1.63298
1ugw_7	Good	1.01	0.97	Other	PHE	Yes	-687.35	-998.299	-310.946	-0.00278884	-1.74999
1ugw_7	Good	1.01	0.97	Other	TYR	No	-687.35	-1073.54	-386.19	-0.00282855	-1.77491
1ugw_8	Good	1.01	1.05	Other	TRP	No	-687.351	-1129.9	-442.55	-0.00335253	-2.10371
1ugx_0	Good	0.99	1.05	Other	PHE	Yes	-687.313	-998.265	-310.942	-0.00914702	-5.73976
1ugx_0	Good	0.99	1.05	Other	TYR	No	-687.314	-1073.51	-386.191	-0.00403122	-2.52959
1urx_0	Good	0.9	0.93	Other	TRP	No	-687.351	-1129.91	-442.548	-0.00891594	-5.59475
1urx_2	Good	0.97	0.97	Other	PHE	Yes	-687.352	-998.301	-310.946	-0.00234627	-1.47228
1urx_2	Good	0.97	0.97	Other	TYR	No	-687.352	-1073.54	-386.19	-0.00242595	-1.52228
1y2v_0	Good	1	1.02	Other	PHE	Yes	-687.355	-998.307	-310.946	-0.00616202	-3.86667
1y2v_0	Good	1	1.02	Other	TYR	No	-687.355	-1073.55	-386.19	-0.0065547	-4.11308
1y2v_1	Good	1	1.01	Other	PHE	Yes	-687.355	-998.308	-310.946	-0.00662122	-4.15482
1y2v_1	Good	1	1.01	Other	TYR	No	-687.356	-1073.55	-386.19	-0.00766232	-4.80811
1y2w_0	Good	1.01	1.01	Other	PHE	Yes	-687.356	-998.309	-310.947	-0.0062879	-3.94565
1y2w_0	Good	1.01	1.01	Other	TYR	No	-687.356	-1073.55	-386.19	-0.00647613	-4.06377
1y2w_1	Good	1.01	1.01	Other	PHE	Yes	-687.355	-998.308	-310.946	-0.00672316	-4.21878
1y2w_1	Good	1.01	1.01	Other	TYR	No	-687.355	-1073.55	-386.19	-0.00705246	-4.42542
1z45_0	Good	1.07	1.07	Other	PHE	Yes	-687.351	-998.303	-310.946	-0.00608588	-3.81889
1z45_0	Good	1.07	1.07	Other	TYR	No	-687.35	-1073.55	-386.19	-0.0065095	-4.08471
2cdo_3	Good	1.04	1.04	Other	PHE	Yes	-687.348	-998.295	-310.943	-0.00472651	-2.96589
2cn3_0	Good	0.97	1.03	Other	PHE	Yes	-687.356	-998.307	-310.947	-0.00380984	-2.39067
2cn3_0	Good	0.97	1.03	Other	TYR	No	-687.356	-1073.55	-386.191	-0.0037914	-2.3791
2cn3_1	Good	0.95	1.03	Other	PHE	Yes	-687.356	-998.307	-310.947	-0.00367954	-2.30891
2cn3_1	Good	0.95	1.03	Other	TYR	No	-687.355	-1073.55	-386.191	-0.00372601	-2.33807
2vno_1	Good	0.88	0.85	Other	TRP	No	-687.355	-1129.91	-442.551	-0.00376334	-2.3615
2vno_4	Good	0.92	0.96	Other	TRP	No	-687.346	-1129.9	-442.55	-0.0037281	-2.33938
2vu9_0	Good	0.98	1.01	Other	PHE	No	-687.351	-998.297	-310.946	-0.00102725	-0.644601
2vu9_0	Good	0.98	1.01	Other	TYR	Yes	-687.352	-1073.54	-386.189	-0.00113363	-0.711355
2vu9_2	Good	0.98	1	Other	PHE	Yes	-687.35	-998.3	-310.946	-0.00391097	-2.45413
2vu9_2	Good	0.98	1	Other	TYR	No	-687.351	-1073.54	-386.189	-0.00476941	-2.9928
2wn2_1	Good	0.95	1.02	Other	PHE	Yes	-687.356	-998.306	-310.945	-0.00456984	-2.86757
2wn2_1	Good	0.95	1.02	Other	TYR	No	-687.357	-1073.55	-386.189	-0.00525312	-3.29634
2wn2_3	Good	0.99	1.02	Other	PHE	Yes	-687.359	-998.305	-310.942	-0.00373461	-2.34347
2wn2_3	Good	0.99	1.02	Other	TYR	No	-687.359	-1073.55	-386.187	-0.00444088	-2.78665
2wn2_5	Good	0.97	1.03	Other	PHE	Yes	-687.352	-998.302	-310.946	-0.0041405	-2.59816
2wn2_5	Good	0.97	1.03	Other	TYR	No	-687.352	-1073.55	-386.189	-0.00472211	-2.96312
2wnb_1	Good	0.99	1	Other	PHE	No	-687.343	-998.291	-310.942	-0.00587279	-3.68517
2wnb_1	Good	0.99	1	Other	TYR	Yes	-687.348	-1073.54	-386.185	-0.00441954	-2.77326
2wnb_2	Good	0.99	0.97	Other	PHE	Yes	-687.349	-998.292	-310.941	-0.00248407	-1.55875
2wnf_1	Good	0.99	0.91	Other	PHE	No	-687.346	-998.291	-310.94	-0.00477797	-2.99817
2wnf_1	Good	0.99	0.91	Other	TYR	Yes	-687.348	-1073.54	-386.183	-0.00467728	-2.93499
2wnf_2	Good	0.99	0.99	Other	PHE	Yes	-687.349	-998.294	-310.942	-0.0023453	-1.47167
2x2t_0	Good	1.01	1.04	Other	TRP	No	-687.353	-1129.91	-442.547	-0.0136334	-8.55495
2xfe_1	Good	0.91	0.92	Other	TRP	No	-687.334	-1129.88	-442.544	-0.00407982	-2.56009
2xon_1	Good	1.01	0.99	Other	TRP	No	-687.354	-1129.91	-442.546	-0.00819312	-5.14118
2xon_2	Good	1.01	1	Other	TRP	No	-687.353	-1129.91	-442.545	-0.00776241	-4.87091
2xon_6	Good	0.98	0.99	Other	TRP	No	-687.352	-1129.9	-442.542	-0.00842069	-5.28398
2xon_7	Good	0.98	1.01	Other	TRP	No	-687.353	-1129.91	-442.548	-0.00768288	-4.82101
2y9g_0	Good	0.89	0.99	Other	PHE	No	-687.353	-998.302	-310.942	-0.00726065	-4.55606
2y9g_0	Good	0.89	0.99	Other	TYR	Yes	-687.345	-1073.53	-386.179	-0.00562008	-3.5266
2yfz_1	Good	0.84	1.04	Other	PHE	Yes	-687.356	-998.304	-310.947	-0.00100256	-0.629109
2z8f_0	Good	1.04	0.99	Other	TRP	No	-687.35	-1129.91	-442.551	-0.00491418	-3.08365
2zhm_0	Good	0.83	1.02	Other	PHE	No	-687.357	-998.307	-310.948	-0.00244766	-1.5359
2zhm_0	Good	0.83	1.02	Other	TYR	Yes	-687.354	-1073.55	-386.191	-0.00220439	-1.38325
3ah4_1	Good	0.99	1.01	Other	PHE	Yes	-687.354	-998.305	-310.948	-0.00352554	-2.21228
3ah4_1	Good	0.99	1.01	Other	TYR	No	-687.354	-1073.55	-386.192	-0.00382484	-2.40009
3e6j_0	Good	1	1.05	Other	PHE	No	-687.356	-998.303	-310.943	-0.00426844	-2.67844
3e6j_0	Good	1	1.05	Other	TYR	Yes	-687.353	-1073.54	-386.187	-0.00446208	-2.79996
3e6j_1	Good	1	1.01	Other	PHE	Yes	-687.352	-998.3	-310.943	-0.00556956	-3.4949
3e6j_1	Good	1	1.01	Other	TYR	No	-687.352	-1073.55	-386.187	-0.00582402	-3.65457
3i0g_0	Good	0.93	1.02	Other	TRP	No	-687.355	-1129.9	-442.544	-0.00309251	-1.94055
3i0l_0	Good	0.92	1.03	Other	TRP	No	-687.355	-1129.91	-442.55	-0.00472654	-2.9659
3qdt_0	Good	0.94	0.95	Other	PHE	Yes	-687.357	-998.309	-310.945	-0.00718445	-4.50824
3qdt_0	Good	0.94	0.95	Other	TYR	No	-687.357	-1073.55	-386.189	-0.00743927	-4.66814
3qdt_1	Good	0.95	0.97	Other	PHE	Yes	-687.355	-998.309	-310.945	-0.00891176	-5.59213
3qdt_1	Good	0.95	0.97	Other	TYR	No	-687.355	-1073.55	-386.189	-0.00801996	-5.03253
3qdx_0	Good	0.99	0.99	Other	PHE	Yes	-687.355	-998.307	-310.945	-0.00689377	-4.32584
3qdx_0	Good	0.99	0.99	Other	TYR	No	-687.355	-1073.55	-386.189	-0.00706742	-4.4348
3qdx_1	Good	0.98	1	Other	PHE	Yes	-687.354	-998.307	-310.945	-0.00791249	-4.96509
3qdx_1	Good	0.98	1	Other	TYR	No	-687.354	-1073.55	-386.189	-0.00786169	-4.93321
3qdy_0	Good	0.88	0.87	Other	PHE	Yes	-687.357	-998.309	-310.945	-0.00703633	-4.4153
3qdy_0	Good	0.88	0.87	Other	TYR	No	-687.357	-1073.55	-386.189	-0.00707118	-4.43716
3qdy_1	Good	0.94	1	Other	PHE	Yes	-687.352	-998.304	-310.945	-0.00695433	-4.36384
3qdy_1	Good	0.94	1	Other	TYR	No	-687.352	-1073.55	-386.189	-0.00711673	-4.46575
3sxe_1	Good	0.81	1.04	Other	TRP	No	-687.341	-1129.89	-442.547	-0.00239671	-1.50393
3urm_2	Good	1.01	0.99	Other	PHE	Yes	-687.356	-998.308	-310.947	-0.00543533	-3.41067
3urm_2	Good	1.01	0.99	Other	TYR	No	-687.356	-1073.55	-386.19	-0.00568893	-3.5698
3urm_5	Good	1.01	0.99	Other	PHE	Yes	-687.356	-998.308	-310.946	-0.00529767	-3.32429
3urm_5	Good	1.01	0.99	Other	TYR	No	-687.356	-1073.55	-386.19	-0.00549212	-3.4463
4a3x_1	Good	0.95	0.96	Other	PHE	Yes	-687.346	-998.294	-310.942	-0.00515433	-3.23434
4a3x_1	Good	0.95	0.96	Other	TYR	No	-687.346	-1073.53	-386.183	-0.00519449	-3.25954
4af9_1	Good	0.93	1	Other	PHE	Yes	-687.35	-998.3	-310.944	-0.00544899	-3.41924
4af9_1	Good	0.93	1	Other	TYR	No	-687.35	-1073.54	-386.188	-0.00562403	-3.52908
4ah4_1	Good	0.8	1.03	Other	PHE	No	-687.356	-998.304	-310.945	-0.00309589	-1.94267
4ah4_1	Good	0.8	1.03	Other	TYR	Yes	-687.355	-1073.55	-386.19	-0.00394019	-2.47247
4akb_0	Good	0.85	0.8	Other	PHE	No	-687.357	-998.304	-310.945	-0.00193475	-1.21406
4akb_0	Good	0.85	0.8	Other	TYR	Yes	-687.357	-1073.55	-386.189	-0.00247144	-1.55083
4akb_10	Good	0.92	0.99	Other	TRP	No	-687.35	-1129.9	-442.55	-0.00361897	-2.27091
4akb_3	Good	0.85	0.85	Other	TRP	No	-687.352	-1129.91	-442.55	-0.00353068	-2.2155
4akb_5	Good	0.96	0.91	Other	PHE	Yes	-687.355	-998.312	-310.946	-0.010029	-6.29321
4akb_5	Good	0.96	0.91	Other	TYR	No	-687.355	-1073.56	-386.19	-0.0101539	-6.37156
4akb_6	Good	0.96	0.99	Other	TRP	No	-687.35	-1129.9	-442.55	-0.0037754	-2.36906
4akb_7	Good	0.92	0.85	Other	PHE	No	-687.355	-998.303	-310.945	-0.00239427	-1.5024
4akb_7	Good	0.92	0.85	Other	TYR	Yes	-687.355	-1073.55	-386.189	-0.00168497	-1.05732
4akb_9	Good	0.92	0.81	Other	PHE	Yes	-687.354	-998.31	-310.946	-0.0100085	-6.28035
4akb_9	Good	0.92	0.81	Other	TYR	No	-687.354	-1073.55	-386.19	-0.0101287	-6.35576
4atf_14	Good	1.03	1.02	Other	TRP	No	-687.346	-1129.91	-442.548	-0.0108443	-6.80482
4aw7_0	Good	1.06	1.04	Other	PHE	No	-687.355	-998.303	-310.941	-0.00657958	-4.12869
4aw7_0	Good	1.06	1.04	Other	TYR	Yes	-687.352	-1073.54	-386.185	-0.00538836	-3.3812
4cp9_0	Good	0.95	1.04	Other	PHE	Yes	-687.345	-998.296	-310.947	-0.00410391	-2.57521
4cp9_0	Good	0.95	1.04	Other	TYR	No	-687.345	-1073.54	-386.191	-0.00452826	-2.84148
4cp9_2	Good	0.87	0.9	Other	PHE	Yes	-687.335	-998.287	-310.947	-0.00490176	-3.07585
4cp9_2	Good	0.87	0.9	Other	TYR	No	-687.335	-1073.53	-386.19	-0.00506391	-3.1776
4cpb_1	Good	0.88	0.98	Other	PHE	Yes	-687.353	-998.305	-310.947	-0.00475985	-2.98681
4cpb_1	Good	0.88	0.98	Other	TYR	No	-687.353	-1073.55	-386.19	-0.00515607	-3.23543
4cpb_2	Good	0.95	1.01	Other	PHE	Yes	-687.344	-998.294	-310.946	-0.00396343	-2.48705
4cpb_2	Good	0.95	1.01	Other	TYR	No	-687.346	-1073.54	-386.19	-0.004597	-2.88462
4d3w_1	Good	0.98	1.03	Other	PHE	Yes	-687.353	-998.302	-310.944	-0.00466852	-2.9295
4d3w_1	Good	0.98	1.03	Other	TYR	No	-687.353	-1073.55	-386.188	-0.00490654	-3.07886
4h04_0	Good	1.03	1.01	Other	TRP	No	-687.352	-1129.9	-442.54	-0.00522474	-3.27852
4h04_1	Good	1.05	1.02	Other	TRP	No	-687.35	-1129.9	-442.544	-0.00527092	-3.3075
4i4s_2	Good	0.92	0.98	Other	PHE	No	-687.357	-998.307	-310.947	-0.00337134	-2.11552
4i4s_2	Good	0.92	0.98	Other	TYR	Yes	-687.355	-1073.55	-386.191	-0.00732563	-4.59683
4i4s_4	Good	1.01	0.95	Other	PHE	Yes	-687.355	-998.307	-310.947	-0.00428342	-2.68784
4i4s_4	Good	1.01	0.95	Other	TYR	No	-687.353	-1073.55	-386.191	-0.00672571	-4.22038
4i4s_9	Good	0.99	0.98	Other	PHE	Yes	-687.355	-998.306	-310.947	-0.00393946	-2.47201
4i4s_9	Good	0.99	0.98	Other	TYR	No	-687.357	-1073.55	-386.191	-0.00400891	-2.51559
4i4x_1	Good	1.02	1.01	Other	PHE	Yes	-687.355	-998.306	-310.947	-0.00476398	-2.9894
4i4x_1	Good	1.02	1.01	Other	TYR	No	-687.355	-1073.55	-386.191	-0.00492315	-3.08928
4i4x_11	Good	0.99	1.03	Other	PHE	Yes	-687.354	-998.305	-310.947	-0.00459091	-2.8808
4i4x_11	Good	0.99	1.03	Other	TYR	No	-687.352	-1073.55	-386.191	-0.00428699	-2.69009
4i4x_14	Good	0.87	1.04	Other	PHE	Yes	-687.353	-998.305	-310.947	-0.00453667	-2.84676
4i4x_14	Good	0.87	1.04	Other	TYR	No	-687.353	-1073.55	-386.191	-0.00728874	-4.57369
4i4x_16	Good	0.87	0.99	Other	PHE	Yes	-687.352	-998.303	-310.946	-0.00434647	-2.72741
4i4x_16	Good	0.87	0.99	Other	TYR	No	-687.352	-1073.55	-386.19	-0.00458083	-2.87447
4i4x_3	Good	1.02	1.01	Other	PHE	Yes	-687.357	-998.308	-310.947	-0.00445912	-2.79809
4i4x_3	Good	1.02	1.01	Other	TYR	No	-687.352	-1073.55	-386.191	-0.00421509	-2.64497
4i4x_4	Good	0.84	1.01	Other	PHE	No	-687.356	-998.311	-310.947	-0.00865202	-5.42915
4i4x_4	Good	0.84	1.01	Other	TYR	Yes	-687.353	-1073.55	-386.191	-0.00384676	-2.41384
4i4x_6	Good	1.02	1.02	Other	PHE	Yes	-687.355	-998.307	-310.947	-0.00460855	-2.89186
4i4x_6	Good	1.02	1.02	Other	TYR	No	-687.355	-1073.55	-386.191	-0.00472775	-2.96666
4i4x_9	Good	0.99	1	Other	PHE	Yes	-687.354	-998.306	-310.947	-0.00471947	-2.96147
4i4x_9	Good	0.99	1	Other	TYR	No	-687.354	-1073.55	-386.191	-0.00485307	-3.0453
4i4y_0	Good	0.98	1.03	Other	PHE	Yes	-687.352	-998.303	-310.947	-0.00449441	-2.82024
4i4y_0	Good	0.98	1.03	Other	TYR	No	-687.352	-1073.55	-386.191	-0.00442712	-2.77802
4i4y_10	Good	0.97	1	Other	PHE	Yes	-687.354	-998.305	-310.947	-0.00471726	-2.96008
4i4y_10	Good	0.97	1	Other	TYR	No	-687.351	-1073.55	-386.191	-0.00437577	-2.74579
4i4y_11	Good	1	1.01	Other	PHE	No	-687.354	-998.31	-310.947	-0.00810999	-5.08902
4i4y_11	Good	1	1.01	Other	TYR	Yes	-687.354	-1073.55	-386.191	-0.00376854	-2.36476
4i4y_13	Good	0.82	0.99	Other	PHE	Yes	-687.354	-998.306	-310.947	-0.00483222	-3.03222
4i4y_13	Good	0.82	0.99	Other	TYR	No	-687.354	-1073.55	-386.191	-0.00501032	-3.14398
4i4y_15	Good	0.82	0.98	Other	PHE	Yes	-687.357	-998.308	-310.947	-0.0047434	-2.97648
4i4y_15	Good	0.82	0.98	Other	TYR	No	-687.353	-1073.55	-386.191	-0.00434384	-2.72576
4i4y_2	Good	0.98	1	Other	PHE	Yes	-687.349	-998.302	-310.947	-0.00612425	-3.84297
4i4y_2	Good	0.98	1	Other	TYR	No	-687.353	-1073.55	-386.191	-0.00208913	-1.31093
4i4y_3	Good	1.01	0.99	Other	PHE	No	-687.358	-998.313	-310.947	-0.00797721	-5.0057
4i4y_3	Good	1.01	0.99	Other	TYR	Yes	-687.355	-1073.55	-386.191	-0.00385986	-2.42206
4i4y_5	Good	1	0.99	Other	PHE	Yes	-687.352	-998.303	-310.947	-0.00443531	-2.78316
4i4y_5	Good	1	0.99	Other	TYR	No	-687.353	-1073.55	-386.191	-0.00468076	-2.93718
4i4y_8	Good	0.97	1.03	Other	PHE	Yes	-687.354	-998.306	-310.948	-0.00464946	-2.91754
4i4y_8	Good	0.97	1.03	Other	TYR	No	-687.354	-1073.55	-386.191	-0.00474603	-2.97814
4jaw_0	Good	0.99	1	Other	TRP	No	-687.35	-1129.89	-442.54	-0.00472884	-2.96735
4jaw_1	Good	1	1.02	Other	TRP	No	-687.349	-1129.9	-442.545	-0.00480899	-3.01764
4kzk_1	Good	1.02	1.02	Other	PHE	No	-687.351	-998.297	-310.942	-0.00422814	-2.65316
4kzk_1	Good	1.02	1.02	Other	TYR	Yes	-687.352	-1073.55	-386.186	-0.00844414	-5.2987
4ljh_0	Good	1.04	1.04	Other	PHE	Yes	-687.342	-998.297	-310.947	-0.00798264	-5.00911
4ljh_0	Good	1.04	1.04	Other	TYR	No	-687.339	-1073.54	-386.192	-0.0043523	-2.73107
4ljh_1	Good	1.04	1.03	Other	PHE	Yes	-687.342	-998.297	-310.947	-0.00781948	-4.90672
4ljh_1	Good	1.04	1.03	Other	TYR	No	-687.342	-1073.54	-386.191	-0.00446742	-2.8033
4ljh_2	Good	0.97	1.02	Other	PHE	Yes	-687.343	-998.293	-310.947	-0.00354044	-2.22162
4ljh_2	Good	0.97	1.02	Other	TYR	No	-687.341	-1073.54	-386.191	-0.00429737	-2.6966
4ljh_3	Good	0.89	1.06	Other	PHE	Yes	-687.342	-998.293	-310.947	-0.00363442	-2.2806
4ljh_3	Good	0.89	1.06	Other	TYR	No	-687.339	-1073.54	-386.19	-0.010213	-6.40869
4lk7_0	Good	1.04	1.05	Other	PHE	Yes	-687.34	-998.291	-310.947	-0.00381686	-2.39508
4lk7_0	Good	1.04	1.05	Other	TYR	No	-687.339	-1073.54	-386.191	-0.00659418	-4.13785
4lk7_1	Good	0.81	1.02	Other	PHE	Yes	-687.338	-998.289	-310.947	-0.00364548	-2.28754
4lk7_1	Good	0.81	1.02	Other	TYR	No	-687.339	-1073.53	-386.192	-0.00356275	-2.23562
4lk7_2	Good	1.04	1.02	Other	PHE	Yes	-687.338	-998.289	-310.947	-0.00436559	-2.73941
4lk7_2	Good	1.04	1.02	Other	TYR	No	-687.34	-1073.54	-386.191	-0.00472044	-2.96208
4lkf_0	Good	1.04	1.04	Other	PHE	Yes	-687.352	-998.304	-310.948	-0.00380099	-2.38512
4lkf_0	Good	1.04	1.04	Other	TYR	No	-687.352	-1073.55	-386.192	-0.00377764	-2.37047
4lkf_1	Good	1.04	1.04	Other	PHE	Yes	-687.353	-998.304	-310.947	-0.0035918	-2.25386
4lkf_1	Good	1.04	1.04	Other	TYR	No	-687.356	-1073.55	-386.191	-0.00410589	-2.57645
4ndv_0	Good	0.86	1	Other	PHE	No	-687.358	-998.309	-310.947	-0.0037657	-2.36298
4ndv_0	Good	0.86	1	Other	TYR	Yes	-687.355	-1073.55	-386.191	-0.00340931	-2.13934
4ouj_0	Good	0.92	1.04	Other	PHE	Yes	-687.344	-998.294	-310.945	-0.00503214	-3.15767
4ouj_0	Good	0.92	1.04	Other	TYR	No	-687.348	-1073.54	-386.189	-0.00565755	-3.55011
4ouj_2	Good	0.88	1.01	Other	PHE	Yes	-687.346	-998.293	-310.943	-0.00497586	-3.12235
4ouj_2	Good	0.88	1.01	Other	TYR	No	-687.351	-1073.54	-386.186	-0.00533722	-3.34911
4rfb_0	Good	0.99	1.05	Other	PHE	No	-687.352	-998.302	-310.947	-0.00337879	-2.12019
4wwh_0	Good	0.95	0.93	Other	TRP	No	-687.351	-1129.91	-442.549	-0.00769539	-4.82886
4wwh_2	Good	0.95	0.93	Other	PHE	Yes	-687.357	-998.307	-310.944	-0.00619778	-3.88911
4wwh_2	Good	0.95	0.93	Other	TYR	No	-687.357	-1073.55	-386.189	-0.00627789	-3.93937
4wwh_5	Good	0.93	0.91	Other	PHE	Yes	-687.357	-998.307	-310.944	-0.00591341	-3.71066
4wwh_5	Good	0.93	0.91	Other	TYR	No	-687.357	-1073.55	-386.189	-0.00612616	-3.84417
4ym3_3	Good	0.91	0.92	Other	TRP	No	-687.359	-1129.92	-442.552	-0.00837843	-5.25746
4yw7_0	Good	0.98	0.93	Other	PHE	Yes	-687.353	-998.305	-310.947	-0.00421559	-2.64529
4yw7_0	Good	0.98	0.93	Other	TYR	No	-687.353	-1073.55	-386.191	-0.00435577	-2.73325
4yw7_1	Good	0.99	0.87	Other	PHE	Yes	-687.353	-998.302	-310.947	-0.00248156	-1.55718
4yw7_1	Good	0.99	0.87	Other	TYR	No	-687.353	-1073.55	-386.191	-0.00274418	-1.72197
4yw7_10	Good	0.99	0.93	Other	PHE	Yes	-687.353	-998.303	-310.947	-0.00380532	-2.38784
4yw7_10	Good	0.99	0.93	Other	TYR	No	-687.353	-1073.55	-386.191	-0.00394916	-2.4781
4yw7_11	Good	0.99	0.91	Other	PHE	Yes	-687.354	-998.304	-310.947	-0.00343211	-2.15365
4yw7_11	Good	0.99	0.91	Other	TYR	No	-687.354	-1073.55	-386.191	-0.00348674	-2.18793
4yw7_2	Good	0.98	0.93	Other	PHE	Yes	-687.357	-998.308	-310.947	-0.00475975	-2.98674
4yw7_2	Good	0.98	0.93	Other	TYR	No	-687.357	-1073.55	-386.191	-0.0051626	-3.23953
4yw7_3	Good	0.98	0.94	Other	PHE	Yes	-687.352	-998.308	-310.947	-0.00938322	-5.88797
4yw7_3	Good	0.98	0.94	Other	TYR	No	-687.353	-1073.55	-386.191	-0.00595597	-3.73737
4yw7_4	Good	1	0.93	Other	PHE	Yes	-687.353	-998.303	-310.947	-0.00384988	-2.4158
4yw7_4	Good	1	0.93	Other	TYR	No	-687.354	-1073.55	-386.191	-0.00567462	-3.56082
4yw7_5	Good	0.97	0.95	Other	PHE	Yes	-687.353	-998.302	-310.947	-0.00235124	-1.4754
4yw7_5	Good	0.97	0.95	Other	TYR	No	-687.353	-1073.55	-386.191	-0.00476369	-2.98921
4yw7_6	Good	1	0.95	Other	PHE	Yes	-687.353	-998.303	-310.947	-0.00267232	-1.67688
4yw7_6	Good	1	0.95	Other	TYR	No	-687.354	-1073.55	-386.191	-0.00500664	-3.14167
4yw7_7	Good	0.99	0.85	Other	PHE	Yes	-687.355	-998.305	-310.947	-0.00322439	-2.02331
4yw7_7	Good	0.99	0.85	Other	TYR	No	-687.356	-1073.55	-386.191	-0.00357523	-2.24346
4yw7_8	Good	0.96	0.91	Other	PHE	Yes	-687.36	-998.311	-310.947	-0.00463415	-2.90793
4yw7_8	Good	0.96	0.91	Other	TYR	No	-687.36	-1073.56	-386.191	-0.00490318	-3.07674
4yw7_9	Good	0.97	0.88	Other	PHE	Yes	-687.357	-998.308	-310.946	-0.00422565	-2.6516
4yw7_9	Good	0.97	0.88	Other	TYR	No	-687.357	-1073.55	-386.19	-0.00462836	-2.9043
4z0n_0	Good	1.07	1.04	Other	PHE	No	-687.356	-998.306	-310.946	-0.00379317	-2.38022
4z0n_0	Good	1.07	1.04	Other	TYR	Yes	-687.355	-1073.55	-386.19	-0.00462006	-2.89909
5bxp_0	Good	0.98	1.04	Other	TRP	No	-687.345	-1129.89	-442.541	-0.00499372	-3.13356
5bxp_1	Good	0.97	1.05	Other	TRP	No	-687.35	-1129.9	-442.542	-0.00632697	-3.97018
5bxr_0	Good	0.95	0.96	Other	TRP	No	-687.353	-1129.9	-442.544	-0.00516017	-3.23801
5bxr_1	Good	0.92	0.96	Other	TRP	No	-687.353	-1129.9	-442.541	-0.00481206	-3.01957
5bxt_0	Good	1	1.04	Other	TRP	No	-687.353	-1129.9	-442.544	-0.00470235	-2.95073
5bxt_1	Good	1.02	1.03	Other	TRP	No	-687.354	-1129.9	-442.545	-0.0047837	-3.00177
5cjz_0	Good	1.03	1.05	Other	TRP	No	-687.357	-1129.92	-442.55	-0.00833077	-5.22756
5j14_0	Good	1.04	1.03	Other	PHE	No	-687.331	-998.282	-310.945	-0.00619897	-3.88985
5j14_0	Good	1.04	1.03	Other	TYR	Yes	-687.336	-1073.53	-386.189	-0.00809841	-5.08175
5j14_1	Good	0.95	1.02	Other	PHE	No	-687.353	-998.305	-310.946	-0.00595015	-3.73372
5j14_1	Good	0.95	1.02	Other	TYR	Yes	-687.35	-1073.55	-386.19	-0.0063948	-4.01274
5j4x_0	Good	0.81	0.91	Other	PHE	Yes	-687.334	-998.285	-310.946	-0.00503993	-3.16256
5j4x_0	Good	0.81	0.91	Other	TYR	No	-687.337	-1073.53	-386.19	-0.00512554	-3.21628
5nle_1	Good	0.95	0.99	Other	TRP	No	-687.351	-1129.91	-442.551	-0.0087526	-5.49226
5ufc_2	Good	1.04	1.06	Other	PHE	Yes	-687.348	-998.3	-310.947	-0.00505035	-3.16909
5ufc_2	Good	1.04	1.06	Other	TYR	No	-687.348	-1073.54	-386.191	-0.00533504	-3.34774
5ufc_3	Good	1.04	1.05	Other	TRP	No	-687.345	-1129.91	-442.551	-0.0105109	-6.59559
5ufc_4	Good	1.01	0.99	Other	PHE	Yes	-687.347	-998.299	-310.946	-0.00529602	-3.32325
5ufc_4	Good	1.01	0.99	Other	TYR	No	-687.347	-1073.54	-386.19	-0.00555398	-3.48512
5vx5_0	Good	0.93	0.95	Other	PHE	Yes	-687.356	-998.305	-310.946	-0.0033608	-2.1089
5vx5_0	Good	0.93	0.95	Other	TYR	No	-687.356	-1073.55	-386.19	-0.00348234	-2.18517
5vx9_0	Good	1	0.89	Other	PHE	Yes	-687.355	-998.309	-310.946	-0.00724677	-4.54735
5vx9_0	Good	1	0.89	Other	TYR	No	-687.355	-1073.55	-386.191	-0.00721155	-4.52525
6a56_0	Good	0.96	0.98	Other	PHE	Yes	-687.353	-998.301	-310.946	-0.00256972	-1.6125
6a56_0	Good	0.96	0.98	Other	TYR	No	-687.353	-1073.55	-386.19	-0.00324364	-2.03538
6a56_1	Good	0.84	0.96	Other	PHE	Yes	-687.351	-998.298	-310.945	-0.00282489	-1.77262
6a56_1	Good	0.84	0.96	Other	TYR	No	-687.351	-1073.54	-386.189	-0.00325347	-2.04155
6gpa_0	Good	0.91	1.02	Other	TRP	No	-687.348	-1129.91	-442.548	-0.0104487	-6.55653
6hur_0	Good	1.01	1.08	Other	PHE	Yes	-687.345	-998.291	-310.944	-0.00253066	-1.58799
6hur_0	Good	1.01	1.08	Other	TYR	No	-687.35	-1073.54	-386.187	-0.00256963	-1.61244
6hus_0	Good	1.07	1.02	Other	PHE	No	-687.345	-998.296	-310.946	-0.00539598	-3.38598
6hus_0	Good	1.07	1.02	Other	TYR	Yes	-687.35	-1073.55	-386.19	-0.00562507	-3.52973
6hus_1	Good	1.07	1.06	Other	TRP	No	-687.348	-1129.9	-442.551	-0.00519635	-3.26071
6l67_1	Good	0.83	1.03	Other	PHE	No	-687.346	-998.294	-310.945	-0.00305399	-1.91638
6l67_1	Good	0.83	1.03	Other	TYR	Yes	-687.35	-1073.54	-386.189	-0.00379458	-2.3811
6lf2_0	Good	0.9	1.01	Other	PHE	No	-687.352	-998.303	-310.946	-0.00528744	-3.31787
6lf2_0	Good	0.9	1.01	Other	TYR	Yes	-687.352	-1073.55	-386.19	-0.0061735	-3.87387
6lf2_3	Good	0.96	1.04	Other	PHE	Yes	-687.354	-998.304	-310.945	-0.00451372	-2.83236
6lf2_3	Good	0.96	1.04	Other	TYR	No	-687.355	-1073.55	-386.189	-0.00496473	-3.11537
6oai_0	Good	0.84	0.97	Other	PHE	No	-687.34	-998.29	-310.947	-0.00393325	-2.46811
6oai_1	Good	0.84	0.81	Other	PHE	Yes	-687.342	-998.294	-310.946	-0.00566615	-3.55551
6oai_1	Good	0.84	0.81	Other	TYR	No	-687.342	-1073.54	-386.19	-0.00566999	-3.55792
6sea_2	Good	0.86	1	Other	TRP	No	-687.353	-1129.9	-442.549	-0.00172042	-1.07956
6ug7_1	Good	1.09	1.07	Other	TRP	No	-687.351	-1129.91	-442.546	-0.0110028	-6.90429
6ug7_2	Good	1.03	1.07	Other	PHE	Yes	-687.35	-998.296	-310.943	-0.00357925	-2.24598
6ug7_2	Good	1.03	1.07	Other	TYR	No	-687.352	-1073.54	-386.186	-0.00382274	-2.39877
6ug8_1	Good	1.05	1.02	Other	TRP	No	-687.348	-1129.91	-442.551	-0.00738423	-4.63361
6ug8_2	Good	1	1.03	Other	PHE	Yes	-687.346	-998.296	-310.946	-0.00319058	-2.00209
6ug8_2	Good	1	1.03	Other	TYR	No	-687.351	-1073.54	-386.188	-0.00331945	-2.08296
6zjq_1	Good	1.02	1.05	Other	TRP	No	-687.353	-1129.91	-442.551	-0.00551594	-3.46125
6zjs_1	Good	0.92	1.07	Other	PHE	Yes	-687.355	-998.305	-310.947	-0.00332251	-2.08488
6zjs_1	Good	0.92	1.07	Other	TYR	No	-687.353	-1073.55	-386.191	-0.00283783	-1.78074
6zjs_2	Good	0.92	1.08	Other	TRP	No	-687.353	-1129.9	-442.545	-0.00507262	-3.18307
6zjs_3	Good	1.08	1.06	Other	TRP	No	-687.353	-1129.91	-442.549	-0.00547056	-3.43277

## Sheet: Bad EDIA
PDB ID	EDIA	GAL_EDIA	AA_EDIA	Type	AA	Converted?	Galactose (a.u.)	Close Contact Pair (a.u.)	Amino Acid (a.u.)	Interaction Energy (a.u.)	Interaction Energy (kcal/mol)
1d1i_0	Bad	0.22	1.01	N/A	PHE	No	N/A	N/A	N/A	N/A	N/A
1g8z_0	Bad	0.79	1.01	N/A	TRP	No	N/A	N/A	N/A	N/A	N/A
1g8z_1	Bad	0.27	0.99	N/A	TRP	No	N/A	N/A	N/A	N/A	N/A
1g8z_2	Bad	0.38	0.95	N/A	TRP	No	N/A	N/A	N/A	N/A	N/A
1gx0_0	Bad	0.25	0.88	N/A	TRP	No	N/A	N/A	N/A	N/A	N/A
1is3_0	Bad	0	0	N/A	TRP	No	N/A	N/A	N/A	N/A	N/A
1is4_0	Bad	0	0	N/A	TRP	No	N/A	N/A	N/A	N/A	N/A
1isz_2	Bad	0.9	0.78	N/A	TYR	No	N/A	N/A	N/A	N/A	N/A
1isz_3	Bad	0.65	0.81	N/A	TYR	No	N/A	N/A	N/A	N/A	N/A
1it0_1	Bad	0.72	0.89	N/A	TYR	No	N/A	N/A	N/A	N/A	N/A
1it0_3	Bad	0.72	0.88	N/A	TYR	No	N/A	N/A	N/A	N/A	N/A
1jz7_4	Bad	0.67	0.9	N/A	TRP	No	N/A	N/A	N/A	N/A	N/A
1jz7_5	Bad	0.67	0.98	N/A	PHE	No	N/A	N/A	N/A	N/A	N/A
1jz7_7	Bad	0.68	0.93	N/A	TRP	No	N/A	N/A	N/A	N/A	N/A
1jz7_8	Bad	0.68	0.96	N/A	PHE	No	N/A	N/A	N/A	N/A	N/A
1jz8_0	Bad	0.63	1	N/A	TYR	No	N/A	N/A	N/A	N/A	N/A
1jz8_1	Bad	0.63	1	N/A	TRP	No	N/A	N/A	N/A	N/A	N/A
1jz8_2	Bad	0.63	1.03	N/A	TRP	No	N/A	N/A	N/A	N/A	N/A
1jz8_3	Bad	0.44	1.04	N/A	TYR	No	N/A	N/A	N/A	N/A	N/A
1jz8_4	Bad	0.44	1.04	N/A	TRP	No	N/A	N/A	N/A	N/A	N/A
1jz8_5	Bad	0.36	1.01	N/A	TYR	No	N/A	N/A	N/A	N/A	N/A
1jz8_6	Bad	0.36	1.03	N/A	TRP	No	N/A	N/A	N/A	N/A	N/A
1jz8_7	Bad	0.19	1.02	N/A	TYR	No	N/A	N/A	N/A	N/A	N/A
1jz8_8	Bad	0.19	1.04	N/A	TRP	No	N/A	N/A	N/A	N/A	N/A
1kjl_0	Bad	0.31	0.99	N/A	TRP	No	N/A	N/A	N/A	N/A	N/A
1knm_0	Bad	0	0	N/A	TRP	No	N/A	N/A	N/A	N/A	N/A
1knm_1	Bad	0	0	N/A	TYR	No	N/A	N/A	N/A	N/A	N/A
1lt3_1	Bad	0.77	1.01	N/A	TRP	No	N/A	N/A	N/A	N/A	N/A
1lt3_2	Bad	0.35	0.97	N/A	TRP	No	N/A	N/A	N/A	N/A	N/A
1lt3_4	Bad	0.49	0.99	N/A	TRP	No	N/A	N/A	N/A	N/A	N/A
1lt4_0	Bad	0.74	1.02	N/A	TRP	No	N/A	N/A	N/A	N/A	N/A
1lt4_1	Bad	0.75	1.02	N/A	TRP	No	N/A	N/A	N/A	N/A	N/A
1lt4_2	Bad	0.35	1.01	N/A	TRP	No	N/A	N/A	N/A	N/A	N/A
1lt4_4	Bad	0.71	0.97	N/A	TRP	No	N/A	N/A	N/A	N/A	N/A
1ms9_0	Bad	0	0	N/A	TRP	No	N/A	N/A	N/A	N/A	N/A
1ms9_1	Bad	0	0	N/A	TRP	No	N/A	N/A	N/A	N/A	N/A
1o7o_0	Bad	0	0	N/A	TRP	No	N/A	N/A	N/A	N/A	N/A
1o7o_1	Bad	0	0	N/A	TRP	No	N/A	N/A	N/A	N/A	N/A
1oko_1	Bad	0	0.96	N/A	TYR	No	N/A	N/A	N/A	N/A	N/A
1oko_2	Bad	0	0.98	N/A	TYR	No	N/A	N/A	N/A	N/A	N/A
1oko_3	Bad	0	0.97	N/A	TYR	No	N/A	N/A	N/A	N/A	N/A
1rez_0	Bad	0	0	N/A	TYR	No	N/A	N/A	N/A	N/A	N/A
1s5e_0	Bad	0.58	1.04	N/A	TRP	No	N/A	N/A	N/A	N/A	N/A
1slt_0	Bad	0	0	N/A	TRP	No	N/A	N/A	N/A	N/A	N/A
1slt_1	Bad	0	0	N/A	TRP	No	N/A	N/A	N/A	N/A	N/A
1ugw_10	Bad	0.54	0.71	N/A	TYR	No	N/A	N/A	N/A	N/A	N/A
1ugw_11	Bad	0.54	1.05	N/A	TRP	No	N/A	N/A	N/A	N/A	N/A
1ugw_9	Bad	0.54	0.83	N/A	TYR	No	N/A	N/A	N/A	N/A	N/A
1uks_0	Bad	0.41	0.95	N/A	TYR	No	N/A	N/A	N/A	N/A	N/A
1v00_0	Bad	0	0	N/A	TYR	No	N/A	N/A	N/A	N/A	N/A
1v00_1	Bad	0	0	N/A	PHE	No	N/A	N/A	N/A	N/A	N/A
1v00_2	Bad	0	0	N/A	TYR	No	N/A	N/A	N/A	N/A	N/A
1v00_3	Bad	0	0	N/A	PHE	No	N/A	N/A	N/A	N/A	N/A
1v00_4	Bad	0	0	N/A	TYR	No	N/A	N/A	N/A	N/A	N/A
1v00_5	Bad	0	0	N/A	PHE	No	N/A	N/A	N/A	N/A	N/A
1v00_6	Bad	0	0	N/A	TYR	No	N/A	N/A	N/A	N/A	N/A
1v00_7	Bad	0	0	N/A	PHE	No	N/A	N/A	N/A	N/A	N/A
1v3m_0	Bad	0.3	1	N/A	PHE	No	N/A	N/A	N/A	N/A	N/A
1v3m_1	Bad	0.36	0.99	N/A	TYR	No	N/A	N/A	N/A	N/A	N/A
1v3m_2	Bad	0.14	0.9	N/A	TYR	No	N/A	N/A	N/A	N/A	N/A
1v3m_3	Bad	0.3	0.95	N/A	PHE	No	N/A	N/A	N/A	N/A	N/A
1v3m_4	Bad	0.3	1.01	N/A	PHE	No	N/A	N/A	N/A	N/A	N/A
1v3m_5	Bad	0.17	0.88	N/A	TYR	No	N/A	N/A	N/A	N/A	N/A
1vzu_0	Bad	0	0	N/A	TRP	No	N/A	N/A	N/A	N/A	N/A
1vzu_1	Bad	0	0	N/A	TYR	No	N/A	N/A	N/A	N/A	N/A
1vzu_2	Bad	0	0	N/A	TYR	No	N/A	N/A	N/A	N/A	N/A
1vzx_0	Bad	0	0	N/A	TYR	No	N/A	N/A	N/A	N/A	N/A
1vzx_1	Bad	0	0	N/A	TYR	No	N/A	N/A	N/A	N/A	N/A
1w8o_0	Bad	0.76	0.97	N/A	TRP	No	N/A	N/A	N/A	N/A	N/A
1wld_0	Bad	0	0	N/A	TRP	No	N/A	N/A	N/A	N/A	N/A
1wlw_0	Bad	0	0	N/A	TRP	No	N/A	N/A	N/A	N/A	N/A
1wpc_0	Bad	0.53	0.99	N/A	TRP	No	N/A	N/A	N/A	N/A	N/A
1zhj_0	Bad	0.65	1	N/A	TRP	No	N/A	N/A	N/A	N/A	N/A
1zj0_0	Bad	0.78	1.01	N/A	TRP	No	N/A	N/A	N/A	N/A	N/A
2bos_0	Bad	0.41	0.97	N/A	TRP	No	N/A	N/A	N/A	N/A	N/A
2bos_1	Bad	0.61	0.99	N/A	TRP	No	N/A	N/A	N/A	N/A	N/A
2bos_2	Bad	0.49	0.98	N/A	TRP	No	N/A	N/A	N/A	N/A	N/A
2bzd_0	Bad	0.58	0.96	N/A	TRP	No	N/A	N/A	N/A	N/A	N/A
2bzd_1	Bad	0.77	0.92	N/A	TRP	No	N/A	N/A	N/A	N/A	N/A
2bzd_2	Bad	0.65	0.93	N/A	TRP	No	N/A	N/A	N/A	N/A	N/A
2chb_0	Bad	0.69	0.94	N/A	TRP	No	N/A	N/A	N/A	N/A	N/A
2chb_2	Bad	0.78	0.9	N/A	TRP	No	N/A	N/A	N/A	N/A	N/A
2d6m_1	Bad	0.55	0.99	N/A	TRP	No	N/A	N/A	N/A	N/A	N/A
2eae_0	Bad	0.51	0.97	N/A	TRP	No	N/A	N/A	N/A	N/A	N/A
2eae_1	Bad	0.51	1.03	N/A	TRP	No	N/A	N/A	N/A	N/A	N/A
2gal_0	Bad	0	0	N/A	TRP	No	N/A	N/A	N/A	N/A	N/A
2gal_1	Bad	0	0	N/A	TRP	No	N/A	N/A	N/A	N/A	N/A
2nmo_0	Bad	0.47	1.01	N/A	TRP	No	N/A	N/A	N/A	N/A	N/A
2nn8_1	Bad	0	0.99	N/A	TRP	No	N/A	N/A	N/A	N/A	N/A
2vng_0	Bad	0.8	0.78	N/A	TRP	No	N/A	N/A	N/A	N/A	N/A
2vng_1	Bad	0.75	0.94	N/A	TRP	No	N/A	N/A	N/A	N/A	N/A
2wkk_2	Bad	0.7	1.03	N/A	TRP	No	N/A	N/A	N/A	N/A	N/A
2wkk_3	Bad	0.4	0.97	N/A	TRP	No	N/A	N/A	N/A	N/A	N/A
2wmk_0	Bad	0.7	1.01	N/A	TRP	No	N/A	N/A	N/A	N/A	N/A
2wsv_1	Bad	0.51	1.05	N/A	TRP	No	N/A	N/A	N/A	N/A	N/A
2wt1_0	Bad	0.92	0.69	N/A	TRP	No	N/A	N/A	N/A	N/A	N/A
2xom_0	Bad	0.75	0.74	N/A	TRP	No	N/A	N/A	N/A	N/A	N/A
2xom_1	Bad	0.75	0.75	N/A	TRP	No	N/A	N/A	N/A	N/A	N/A
2xom_2	Bad	0.75	0.75	N/A	TRP	No	N/A	N/A	N/A	N/A	N/A
2xom_3	Bad	0.75	0.77	N/A	TRP	No	N/A	N/A	N/A	N/A	N/A
2xom_4	Bad	0.75	0.77	N/A	TRP	No	N/A	N/A	N/A	N/A	N/A
2xrs_3	Bad	0.78	0.97	N/A	TRP	No	N/A	N/A	N/A	N/A	N/A
2xrs_6	Bad	0.68	0.98	N/A	TRP	No	N/A	N/A	N/A	N/A	N/A
2xrs_8	Bad	0.34	0.97	N/A	TRP	No	N/A	N/A	N/A	N/A	N/A
2xrs_9	Bad	0.79	0.92	N/A	TRP	No	N/A	N/A	N/A	N/A	N/A
2y9g_1	Bad	0	0.99	N/A	PHE	No	N/A	N/A	N/A	N/A	N/A
2y9g_3	Bad	0	0.91	N/A	TYR	No	N/A	N/A	N/A	N/A	N/A
2y9g_5	Bad	0	0.97	N/A	PHE	No	N/A	N/A	N/A	N/A	N/A
2yfo_0	Bad	0	0.94	N/A	TRP	No	N/A	N/A	N/A	N/A	N/A
2yfo_1	Bad	0	0.96	N/A	TRP	No	N/A	N/A	N/A	N/A	N/A
2ymz_0	Bad	0.28	0.98	N/A	TRP	No	N/A	N/A	N/A	N/A	N/A
2ymz_1	Bad	0.78	0.97	N/A	TRP	No	N/A	N/A	N/A	N/A	N/A
2z8f_2	Bad	0.67	1	N/A	TRP	No	N/A	N/A	N/A	N/A	N/A
2z8f_3	Bad	0.67	1.02	N/A	TRP	No	N/A	N/A	N/A	N/A	N/A
2zgo_1	Bad	0.78	1.02	N/A	TRP	No	N/A	N/A	N/A	N/A	N/A
2zhk_1	Bad	0.39	0.98	N/A	TRP	No	N/A	N/A	N/A	N/A	N/A
2zhl_3	Bad	0.58	0.99	N/A	TRP	No	N/A	N/A	N/A	N/A	N/A
2zhm_2	Bad	0.52	0.83	N/A	PHE	No	N/A	N/A	N/A	N/A	N/A
2zqn_1	Bad	0.65	0.97	N/A	TRP	No	N/A	N/A	N/A	N/A	N/A
3a23_2	Bad	0.76	0.9	N/A	TYR	No	N/A	N/A	N/A	N/A	N/A
3a23_3	Bad	0.76	0.97	N/A	TRP	No	N/A	N/A	N/A	N/A	N/A
3nv4_0	Bad	0.39	1	N/A	TRP	No	N/A	N/A	N/A	N/A	N/A
3phz_0	Bad	0.48	0.97	N/A	TYR	No	N/A	N/A	N/A	N/A	N/A
3phz_1	Bad	0.63	1.05	N/A	TYR	No	N/A	N/A	N/A	N/A	N/A
3sxb_0	Bad	0.76	0.98	N/A	TRP	No	N/A	N/A	N/A	N/A	N/A
3wuc_0	Bad	-1	-1	N/A	TRP	No	N/A	N/A	N/A	N/A	N/A
3wuc_1	Bad	-1	-1	N/A	TRP	No	N/A	N/A	N/A	N/A	N/A
3wud_0	Bad	-1	-1	N/A	TRP	No	N/A	N/A	N/A	N/A	N/A
4afc_0	Bad	0.48	1.01	N/A	TRP	No	N/A	N/A	N/A	N/A	N/A
4ah4_0	Bad	0.32	0.96	N/A	PHE	No	N/A	N/A	N/A	N/A	N/A
4akb_1	Bad	0.85	0.79	N/A	TYR	No	N/A	N/A	N/A	N/A	N/A
4akb_2	Bad	0.85	0.76	N/A	TYR	No	N/A	N/A	N/A	N/A	N/A
4asl_0	Bad	0.76	1.02	N/A	TRP	No	N/A	N/A	N/A	N/A	N/A
4asl_1	Bad	0.76	0.97	N/A	TYR	No	N/A	N/A	N/A	N/A	N/A
4atf_12	Bad	0.18	0.94	N/A	TYR	No	N/A	N/A	N/A	N/A	N/A
4atf_13	Bad	0.26	0.97	N/A	TRP	No	N/A	N/A	N/A	N/A	N/A
4atf_16	Bad	0.04	0.99	N/A	TYR	No	N/A	N/A	N/A	N/A	N/A
4atf_17	Bad	0.04	0.99	N/A	PHE	No	N/A	N/A	N/A	N/A	N/A
4atf_18	Bad	0.25	0.98	N/A	TRP	No	N/A	N/A	N/A	N/A	N/A
4atf_2	Bad	0.06	1.01	N/A	TYR	No	N/A	N/A	N/A	N/A	N/A
4atf_3	Bad	0.06	1.02	N/A	PHE	No	N/A	N/A	N/A	N/A	N/A
4atf_4	Bad	0.21	0.97	N/A	TRP	No	N/A	N/A	N/A	N/A	N/A
4atf_7	Bad	0.14	1.01	N/A	TYR	No	N/A	N/A	N/A	N/A	N/A
4atf_8	Bad	0.14	1.02	N/A	PHE	No	N/A	N/A	N/A	N/A	N/A
4atf_9	Bad	0.25	0.99	N/A	TRP	No	N/A	N/A	N/A	N/A	N/A
4aw7_2	Bad	0	1.04	N/A	TYR	No	N/A	N/A	N/A	N/A	N/A
4aw7_3	Bad	0	1.04	N/A	PHE	No	N/A	N/A	N/A	N/A	N/A
4bme_0	Bad	0.78	0.84	N/A	TRP	No	N/A	N/A	N/A	N/A	N/A
4cou_0	Bad	0.43	1.03	N/A	TRP	No	N/A	N/A	N/A	N/A	N/A
4coy_0	Bad	0.34	1.02	N/A	TRP	No	N/A	N/A	N/A	N/A	N/A
4cp9_1	Bad	0.66	1.03	N/A	TYR	No	N/A	N/A	N/A	N/A	N/A
4cp9_3	Bad	0.72	1.04	N/A	TYR	No	N/A	N/A	N/A	N/A	N/A
4cpb_0	Bad	0.72	0.84	N/A	TYR	No	N/A	N/A	N/A	N/A	N/A
4cpb_3	Bad	0.78	1.02	N/A	TYR	No	N/A	N/A	N/A	N/A	N/A
4d6d_0	Bad	0	1.03	N/A	TRP	No	N/A	N/A	N/A	N/A	N/A
4d6g_0	Bad	0	0.97	N/A	TRP	No	N/A	N/A	N/A	N/A	N/A
4ds0_0	Bad	0.49	0.93	N/A	TYR	No	N/A	N/A	N/A	N/A	N/A
4ds0_1	Bad	0.49	0.94	N/A	TYR	No	N/A	N/A	N/A	N/A	N/A
4frl_0	Bad	0.73	0.87	N/A	TRP	No	N/A	N/A	N/A	N/A	N/A
4frm_0	Bad	0.78	0.9	N/A	TRP	No	N/A	N/A	N/A	N/A	N/A
4fro_0	Bad	0.72	0.87	N/A	TRP	No	N/A	N/A	N/A	N/A	N/A
4frp_0	Bad	0.7	0.91	N/A	TRP	No	N/A	N/A	N/A	N/A	N/A
4gal_0	Bad	0	0	N/A	TRP	No	N/A	N/A	N/A	N/A	N/A
4i4s_0	Bad	0.79	0.94	N/A	PHE	No	N/A	N/A	N/A	N/A	N/A
4i4s_1	Bad	0.79	0.89	N/A	TYR	No	N/A	N/A	N/A	N/A	N/A
4i4s_7	Bad	0.77	0.94	N/A	PHE	No	N/A	N/A	N/A	N/A	N/A
4i4s_8	Bad	0.77	0.65	N/A	TYR	No	N/A	N/A	N/A	N/A	N/A
4i4x_12	Bad	0.73	1.01	N/A	PHE	No	N/A	N/A	N/A	N/A	N/A
4i4x_13	Bad	0.73	0.96	N/A	TYR	No	N/A	N/A	N/A	N/A	N/A
4izx_0	Bad	-1	-1	N/A	TYR	No	N/A	N/A	N/A	N/A	N/A
4j2s_0	Bad	0.68	1.01	N/A	TYR	No	N/A	N/A	N/A	N/A	N/A
4lbj_0	Bad	0.7	1.04	N/A	TRP	No	N/A	N/A	N/A	N/A	N/A
4lbl_0	Bad	0.67	1	N/A	TRP	No	N/A	N/A	N/A	N/A	N/A
4lbm_0	Bad	0.71	1.02	N/A	TRP	No	N/A	N/A	N/A	N/A	N/A
4lbn_0	Bad	0.52	1.02	N/A	TRP	No	N/A	N/A	N/A	N/A	N/A
4lbo_0	Bad	0.36	1.02	N/A	TRP	No	N/A	N/A	N/A	N/A	N/A
4lk7_3	Bad	0.44	0.98	N/A	TYR	No	N/A	N/A	N/A	N/A	N/A
4mby_0	Bad	0.77	0	N/A	PHE	No	N/A	N/A	N/A	N/A	N/A
4mby_1	Bad	0.74	0.9	N/A	PHE	No	N/A	N/A	N/A	N/A	N/A
4mby_2	Bad	0.7	0.89	N/A	PHE	No	N/A	N/A	N/A	N/A	N/A
4mby_3	Bad	0.63	0.84	N/A	PHE	No	N/A	N/A	N/A	N/A	N/A
4mby_4	Bad	0.79	0.86	N/A	PHE	No	N/A	N/A	N/A	N/A	N/A
4mby_5	Bad	0.61	0.5	N/A	PHE	No	N/A	N/A	N/A	N/A	N/A
4mby_6	Bad	0.67	0.71	N/A	PHE	No	N/A	N/A	N/A	N/A	N/A
4mbz_0	Bad	0.7	0.78	N/A	PHE	No	N/A	N/A	N/A	N/A	N/A
4mbz_1	Bad	0.67	0.84	N/A	PHE	No	N/A	N/A	N/A	N/A	N/A
4mbz_2	Bad	0.56	0.74	N/A	PHE	No	N/A	N/A	N/A	N/A	N/A
4mbz_3	Bad	0.6	0.64	N/A	PHE	No	N/A	N/A	N/A	N/A	N/A
4mbz_4	Bad	0.43	0.41	N/A	PHE	No	N/A	N/A	N/A	N/A	N/A
4mbz_5	Bad	0.75	0.56	N/A	PHE	No	N/A	N/A	N/A	N/A	N/A
4r6p_0	Bad	0.28	0.94	N/A	TYR	No	N/A	N/A	N/A	N/A	N/A
4r6p_1	Bad	0.28	0.84	N/A	TYR	No	N/A	N/A	N/A	N/A	N/A
4r6p_2	Bad	0.28	1.03	N/A	TRP	No	N/A	N/A	N/A	N/A	N/A
4r9a_0	Bad	-1	0.9	N/A	TRP	No	N/A	N/A	N/A	N/A	N/A
4r9b_0	Bad	-1	0.78	N/A	TRP	No	N/A	N/A	N/A	N/A	N/A
4r9c_0	Bad	-1	0.8	N/A	TRP	No	N/A	N/A	N/A	N/A	N/A
4r9d_0	Bad	-1	0.96	N/A	TRP	No	N/A	N/A	N/A	N/A	N/A
4rl7_0	Bad	-1	0.89	N/A	TRP	No	N/A	N/A	N/A	N/A	N/A
4uso_0	Bad	0.72	1.06	N/A	TRP	No	N/A	N/A	N/A	N/A	N/A
4w8b_0	Bad	0.78	0.92	N/A	TRP	No	N/A	N/A	N/A	N/A	N/A
4y1u_0	Bad	0.76	1	N/A	TRP	No	N/A	N/A	N/A	N/A	N/A
4y1u_1	Bad	0.78	0.99	N/A	TRP	No	N/A	N/A	N/A	N/A	N/A
4y1y_0	Bad	0.41	0.96	N/A	TRP	No	N/A	N/A	N/A	N/A	N/A
4yfz_0	Bad	-1	-1	N/A	TYR	No	N/A	N/A	N/A	N/A	N/A
4yg0_0	Bad	0.41	0.92	N/A	TYR	No	N/A	N/A	N/A	N/A	N/A
4yg6_0	Bad	0.62	0.97	N/A	TYR	No	N/A	N/A	N/A	N/A	N/A
4ym1_0	Bad	0.59	0.99	N/A	TRP	No	N/A	N/A	N/A	N/A	N/A
4ym1_1	Bad	0.67	0.9	N/A	TRP	No	N/A	N/A	N/A	N/A	N/A
5a56_0	Bad	0.34	0.87	N/A	TRP	No	N/A	N/A	N/A	N/A	N/A
5ajb_0	Bad	-1	-1	N/A	TRP	No	N/A	N/A	N/A	N/A	N/A
5bn6_0	Bad	-1	-1	N/A	PHE	No	N/A	N/A	N/A	N/A	N/A
5bn6_1	Bad	-1	-1	N/A	TYR	No	N/A	N/A	N/A	N/A	N/A
5bn6_10	Bad	-1	-1	N/A	TRP	No	N/A	N/A	N/A	N/A	N/A
5bn6_11	Bad	-1	-1	N/A	PHE	No	N/A	N/A	N/A	N/A	N/A
5bn6_12	Bad	-1	-1	N/A	TYR	No	N/A	N/A	N/A	N/A	N/A
5bn6_13	Bad	-1	-1	N/A	TYR	No	N/A	N/A	N/A	N/A	N/A
5bn6_14	Bad	-1	-1	N/A	TRP	No	N/A	N/A	N/A	N/A	N/A
5bn6_2	Bad	-1	-1	N/A	TYR	No	N/A	N/A	N/A	N/A	N/A
5bn6_3	Bad	-1	-1	N/A	TRP	No	N/A	N/A	N/A	N/A	N/A
5bn6_4	Bad	-1	-1	N/A	PHE	No	N/A	N/A	N/A	N/A	N/A
5bn6_5	Bad	-1	-1	N/A	TYR	No	N/A	N/A	N/A	N/A	N/A
5bn6_6	Bad	-1	-1	N/A	TYR	No	N/A	N/A	N/A	N/A	N/A
5bn6_7	Bad	-1	-1	N/A	TRP	No	N/A	N/A	N/A	N/A	N/A
5bn6_8	Bad	-1	-1	N/A	TYR	No	N/A	N/A	N/A	N/A	N/A
5bn6_9	Bad	-1	-1	N/A	TYR	No	N/A	N/A	N/A	N/A	N/A
5cb7_0	Bad	0	0.97	N/A	TYR	No	N/A	N/A	N/A	N/A	N/A
5cb7_1	Bad	0	0.95	N/A	TYR	No	N/A	N/A	N/A	N/A	N/A
5cbl_0	Bad	-1	-1	N/A	TRP	No	N/A	N/A	N/A	N/A	N/A
5cbl_2	Bad	-1	-1	N/A	TRP	No	N/A	N/A	N/A	N/A	N/A
5cbl_3	Bad	-1	-1	N/A	TRP	No	N/A	N/A	N/A	N/A	N/A
5dux_1	Bad	0.75	0.98	N/A	TRP	No	N/A	N/A	N/A	N/A	N/A
5elb_0	Bad	0.77	1.03	N/A	TRP	No	N/A	N/A	N/A	N/A	N/A
5elb_1	Bad	0.76	1.01	N/A	TRP	No	N/A	N/A	N/A	N/A	N/A
5elb_5	Bad	0	1.01	N/A	TRP	No	N/A	N/A	N/A	N/A	N/A
5elb_6	Bad	0	1.03	N/A	TRP	No	N/A	N/A	N/A	N/A	N/A
5eld_0	Bad	0.69	1.05	N/A	TRP	No	N/A	N/A	N/A	N/A	N/A
5eld_1	Bad	0.63	1.07	N/A	TRP	No	N/A	N/A	N/A	N/A	N/A
5f90_0	Bad	0.77	0.99	N/A	TYR	No	N/A	N/A	N/A	N/A	N/A
5fks_0	Bad	-1	-1	N/A	TYR	No	N/A	N/A	N/A	N/A	N/A
5fks_1	Bad	-1	-1	N/A	PHE	No	N/A	N/A	N/A	N/A	N/A
5gzd_0	Bad	0.22	0.99	N/A	TRP	No	N/A	N/A	N/A	N/A	N/A
5jm1_0	Bad	0.7	1.01	N/A	TYR	No	N/A	N/A	N/A	N/A	N/A
5jm1_1	Bad	0.7	1.01	N/A	TYR	No	N/A	N/A	N/A	N/A	N/A
5jop_1	Bad	0	0	N/A	TRP	No	N/A	N/A	N/A	N/A	N/A
5jop_3	Bad	0	0	N/A	TRP	No	N/A	N/A	N/A	N/A	N/A
5jpg_0	Bad	-1	-1	N/A	TRP	No	N/A	N/A	N/A	N/A	N/A
5jpg_1	Bad	-1	-1	N/A	TRP	No	N/A	N/A	N/A	N/A	N/A
5jpv_1	Bad	0.77	1.04	N/A	TRP	No	N/A	N/A	N/A	N/A	N/A
5jsd_0	Bad	-1	-1	N/A	TYR	No	N/A	N/A	N/A	N/A	N/A
5jsd_1	Bad	-1	-1	N/A	TYR	No	N/A	N/A	N/A	N/A	N/A
5jsd_2	Bad	-1	-1	N/A	TYR	No	N/A	N/A	N/A	N/A	N/A
5mu9_0	Bad	-1	-1	N/A	TRP	No	N/A	N/A	N/A	N/A	N/A
5mxh_4	Bad	0.87	0.79	N/A	TRP	No	N/A	N/A	N/A	N/A	N/A
5ta5_0	Bad	0.66	1.01	N/A	TRP	No	N/A	N/A	N/A	N/A	N/A
5ufc_0	Bad	-1	-1	N/A	TYR	No	N/A	N/A	N/A	N/A	N/A
5ufc_1	Bad	-1	-1	N/A	TRP	No	N/A	N/A	N/A	N/A	N/A
5xfd_0	Bad	-1	-1	N/A	TRP	No	N/A	N/A	N/A	N/A	N/A
5xfd_1	Bad	-1	-1	N/A	TRP	No	N/A	N/A	N/A	N/A	N/A
6a1t_0	Bad	-1	-1	N/A	TRP	No	N/A	N/A	N/A	N/A	N/A
6a63_0	Bad	0.23	1.05	N/A	TRP	No	N/A	N/A	N/A	N/A	N/A
6a64_0	Bad	-1	-1	N/A	TRP	No	N/A	N/A	N/A	N/A	N/A
6b8k_0	Bad	-1	-1	N/A	TRP	No	N/A	N/A	N/A	N/A	N/A
6eym_0	Bad	0.74	0.89	N/A	TRP	No	N/A	N/A	N/A	N/A	N/A
6f6y_0	Bad	0.32	1.03	N/A	TRP	No	N/A	N/A	N/A	N/A	N/A
6h0h_1	Bad	0	1.02	N/A	TRP	No	N/A	N/A	N/A	N/A	N/A
6h0h_4	Bad	0	1.03	N/A	TRP	No	N/A	N/A	N/A	N/A	N/A
6h0h_6	Bad	0	1.02	N/A	TRP	No	N/A	N/A	N/A	N/A	N/A
6h0h_9	Bad	0	1.01	N/A	TRP	No	N/A	N/A	N/A	N/A	N/A
6hmy_1	Bad	0	1.03	N/A	TRP	No	N/A	N/A	N/A	N/A	N/A
6hmy_2	Bad	0	1.03	N/A	TRP	No	N/A	N/A	N/A	N/A	N/A
6hmy_6	Bad	0	1.01	N/A	TRP	No	N/A	N/A	N/A	N/A	N/A
6hmy_7	Bad	0	1.05	N/A	TRP	No	N/A	N/A	N/A	N/A	N/A
6jyn_0	Bad	0.79	0.96	N/A	TRP	No	N/A	N/A	N/A	N/A	N/A
6jyn_1	Bad	0.65	1.01	N/A	TRP	No	N/A	N/A	N/A	N/A	N/A
6jyn_2	Bad	0.74	0.97	N/A	TRP	No	N/A	N/A	N/A	N/A	N/A
6jyn_3	Bad	0.7	0.98	N/A	TRP	No	N/A	N/A	N/A	N/A	N/A
6jys_3	Bad	0.79	1.03	N/A	TRP	No	N/A	N/A	N/A	N/A	N/A
6ljq_0	Bad	0.68	1.02	N/A	TRP	No	N/A	N/A	N/A	N/A	N/A
6ljr_0	Bad	0.76	0.98	N/A	TRP	No	N/A	N/A	N/A	N/A	N/A
6m5y_0	Bad	-1	-1	N/A	TRP	No	N/A	N/A	N/A	N/A	N/A
6m5y_1	Bad	-1	-1	N/A	TRP	No	N/A	N/A	N/A	N/A	N/A
6mgl_0	Bad	0.75	1.02	N/A	TYR	No	N/A	N/A	N/A	N/A	N/A
6mgl_1	Bad	0.61	1.02	N/A	TRP	No	N/A	N/A	N/A	N/A	N/A
6nuy_0	Bad	-1	-1	N/A	TRP	No	N/A	N/A	N/A	N/A	N/A
6orf_1	Bad	-1	-1	N/A	TRP	No	N/A	N/A	N/A	N/A	N/A
6p2o_0	Bad	0.65	1.05	N/A	TYR	No	N/A	N/A	N/A	N/A	N/A
6p4m_0	Bad	-1	-1	N/A	TYR	No	N/A	N/A	N/A	N/A	N/A
6p4m_1	Bad	-1	-1	N/A	TYR	No	N/A	N/A	N/A	N/A	N/A
6p4m_2	Bad	-1	-1	N/A	TYR	No	N/A	N/A	N/A	N/A	N/A
6sea_0	Bad	0.41	0.98	N/A	TRP	No	N/A	N/A	N/A	N/A	N/A
6sea_1	Bad	0.79	1.01	N/A	TRP	No	N/A	N/A	N/A	N/A	N/A
6sto_0	Bad	-1	-1	N/A	TYR	No	N/A	N/A	N/A	N/A	N/A
6vtq_0	Bad	-1	-1	N/A	TRP	No	N/A	N/A	N/A	N/A	N/A
6vtq_1	Bad	-1	-1	N/A	TRP	No	N/A	N/A	N/A	N/A	N/A
6vts_0	Bad	-1	-1	N/A	TRP	No	N/A	N/A	N/A	N/A	N/A
6vts_1	Bad	-1	-1	N/A	TRP	No	N/A	N/A	N/A	N/A	N/A
6xtg_0	Bad	0	0	N/A	TRP	No	N/A	N/A	N/A	N/A	N/A
6xuk_0	Bad	0	0	N/A	TRP	No	N/A	N/A	N/A	N/A	N/A
6y4c_0	Bad	-1	-1	N/A	TRP	No	N/A	N/A	N/A	N/A	N/A
6y78_0	Bad	-1	-1	N/A	TRP	No	N/A	N/A	N/A	N/A	N/A
6y9j_0	Bad	-1	-1	N/A	TRP	No	N/A	N/A	N/A	N/A	N/A
6y9j_1	Bad	-1	-1	N/A	TYR	No	N/A	N/A	N/A	N/A	N/A
6zjr_0	Bad	0.52	0.99	N/A	PHE	No	N/A	N/A	N/A	N/A	N/A
6zjs_0	Bad	0.5	1.05	N/A	TRP	No	N/A	N/A	N/A	N/A	N/A
6zjt_0	Bad	0.54	0.96	N/A	PHE	No	N/A	N/A	N/A	N/A	N/A
6zjt_1	Bad	0.22	0.91	N/A	TRP	No	N/A	N/A	N/A	N/A	N/A
6zjt_2	Bad	0.59	0.97	N/A	TRP	No	N/A	N/A	N/A	N/A	N/A
7cwd_0	Bad	0	1.03	N/A	TYR	No	N/A	N/A	N/A	N/A	N/A
7cwd_1	Bad	0	1.04	N/A	TRP	No	N/A	N/A	N/A	N/A	N/A
7cya_0	Bad	-1	-1	N/A	TRP	No	N/A	N/A	N/A	N/A	N/A
7ki5_0	Bad	0.23	0.82	N/A	PHE	No	N/A	N/A	N/A	N/A	N/A
7ki5_1	Bad	0.23	0.47	N/A	TYR	No	N/A	N/A	N/A	N/A	N/A
7l63_0	Bad	-1	-1	N/A	TYR	No	N/A	N/A	N/A	N/A	N/A
